# Supplementary material
Source: PubMed Central journal article supplement (PMC2891776)
Supplement: NIHMS209410-supplement-1_si_001.pdf [file NIHMS209410-supplement-1_si_001.pdf]

Supporting Information for

# Molecular Switch Controlling the Binding of Anionic Bile Acid Conjugates to Human Apical Sodium-dependent Bile Acid Transporter

*Rana Rais*<sup>1</sup>, *Chayan Acharya*<sup>1</sup>, *Gasirat Tririya*, *Alexander D. MacKerell, Jr.*\*, *James E. Polli*\*

<sup>1</sup>Contributed equally to the work

Department of Pharmaceutical Sciences, School of Pharmacy, University of Maryland,  
20 Penn Street, Baltimore, MD 21201

\* Department of Pharmaceutical Sciences, School of Pharmacy, University of Maryland,  
20 Penn Street, HSF2 Room 623, Baltimore, MD 21201, Telephone: 410-706-8292, Fax :  
410-706-5017 E-mail : [jpolli@rx.umaryland.edu](mailto:jpolli@rx.umaryland.edu)

Department of Pharmaceutical Sciences, School of Pharmacy, University of Maryland,  
20 Penn Street, HSF2 Room 629, Baltimore, MD 21201, Telephone: 410-706-7442, Fax :  
410-706-5017 E-mail : [amackere@rx.umaryland.edu](mailto:amackere@rx.umaryland.edu)

| <u>Table of Contents</u>                                                                                                                                                                                                                                    | <u>page</u> |
|-------------------------------------------------------------------------------------------------------------------------------------------------------------------------------------------------------------------------------------------------------------|-------------|
| <b>Table S1.</b> NMR and mass spectrometry results for <b>1-35</b> .                                                                                                                                                                                        | S3          |
| <b>Table S2.</b> Elemental analysis results for <b>1-35</b> .                                                                                                                                                                                               | S7          |
| <b>Table S3.</b> Correlation matrix of structural descriptors for aniline conjugates of glu-CDCA.                                                                                                                                                           | S9          |
| <b>Table S4.</b> Values of structural and physico-chemical descriptors for the anilinyll conjugate of glu-CDCA in quantitative CSP-SAR analysis.                                                                                                            | S15         |
| <b>Table S5.</b> Results from multivariable regression analysis and modified AIC <sub>C</sub> for the best CSP-SAR model for anilinyll conjugates <b>1-33</b> of glu-CDCA.                                                                                  | S19         |
| <b>Table S6.</b> Results from single variable regression of molecular descriptors used for multivariable analysis.                                                                                                                                          | S20         |
| <b>Table S7.</b> Results from multivariable regression analysis and modified AIC <sub>C</sub> for the two best CSP-SAR models for anilinyll conjugates of glu-CDCA using p <i>K</i> <sub>i</sub> (i.e. -log <i>K</i> <sub>i</sub> ) as biological activity. | S22         |
| <b>Table S8.</b> <sup>13</sup> C and <sup>1</sup> H chemical shifts of <b>32</b> in D <sub>2</sub> O-phosphate (pH 7.4).                                                                                                                                    | S23         |
| <b>Figure S1.</b> Regression plot for predicted vs. observed <i>K</i> <sub>i</sub> values for anilinyll conjugates of glu-CDCA using CSP-SAR (A) Model 2 and (B) Model 3, which are the models in Table 2.                                                  | S24         |
| <b>Figure S2.</b> Regression plot for predicted vs. observed p <i>K</i> <sub>i</sub> values for anilinyll conjugates of glu-CDCA using CSP-SAR (A) Model 1 and (B) Model 2, which are the models in Table S7.                                               | S24         |

**Table S1.** NMR and mass spectrometry results for **1-35**.

Compound 1. MS: [M+1] 597.4. <sup>13</sup>C NMR (DMSO-d6): δ 11.64, 18.35, 20.24, 22.69, 23.14, 26.73, 27.78, 30.54, 31.49, 32.10, 32.26, 32.75, 34.72, 34.82, 34.98, 35.29, 39.09, 39.41, 39.61, 41.40, 41.89, 49.99, 51.42, 55.59, 66.14, 70.32, 119.00, 119.00, 122.92, 128.60, 128.60, 139.24, 170.31, 172.75, 173.55

Compound 2. MS: [M+1] 631.3. <sup>13</sup>C NMR (DMSO-d6): δ 11.62, 18.32, 20.22, 22.69, 23.12, 26.74, 27.77, 30.54, 31.49, 32.16, 32.24, 32.78, 34.71, 34.81, 34.97, 35.30, 39.09, 39.41, 39.61, 41.40, 41.89, 49.97, 51.46, 55.59, 66.14, 70.31, 120.48, 120.48, 126.42, 128.51, 128.51, 138.21, 170.55, 172.67, 173.51

Compound 3. MS: [M+1] 665.4. <sup>13</sup>C NMR (DMSO-d6): δ 11.62, 18.32, 20.22, 22.68, 23.12, 26.45, 27.77, 30.52, 31.49, 32.12, 32.25, 32.81, 34.71, 34.81, 34.97, 35.28, 39.09, 39.41, 39.61, 41.40, 41.89, 49.99, 51.26, 55.61, 66.14, 70.31, 118.80, 118.93, 123.07, 123.31, 125.97, 125.97, 142.77, 171.00, 172.77, 173.50

Compound 4. MS: [M+1] 615.2. <sup>13</sup>C NMR (DMSO-d6): δ 11.64, 18.35, 20.24, 22.69, 23.14, 26.74, 27.78, 30.54, 31.49, 32.09, 32.27, 32.28, 34.72, 34.82, 34.97, 35.29, 39.09, 39.41, 39.61, 41.40, 41.89, 49.99, 51.37, 55.60, 66.14, 70.32, 115.33, 124.21, 125.11, 126.09, 126.18, 154.61, 170.77, 172.76, 173.52

Compound 5. MS: [M+1] 615.3. <sup>13</sup>C NMR (DMSO-d6): δ 11.64, 18.35, 20.24, 22.69, 23.14, 26.49, 27.78, 30.54, 31.49, 32.11, 32.27, 32.75, 34.72, 34.82, 34.97, 35.30, 39.09, 39.41, 39.61, 41.40, 41.89, 49.99, 51.29, 55.60, 66.14, 70.32, 109.29, 109.45, 114.68, 130.27, 140.99, 161.15, 170.77, 172.76, 173.52

Compound 6. MS: [M+1] 615.4. <sup>13</sup>C NMR (DMSO-d6): δ 11.63, 18.33, 20.24, 22.69, 23.13, 26.69, 27.78, 30.54, 31.49, 32.11, 32.27, 32.64, 34.71, 34.82, 34.98, 35.30, 39.09, 39.41, 39.61, 41.40, 41.89, 49.99, 51.40, 55.60, 66.14, 70.33, 115.05, 115.23, 120.66, 120.72, 135.64, 158.75, 170.20, 172.79, 173.54

Compound 7. MS: [M+1] 611.4. <sup>13</sup>C NMR (DMSO-d6): δ 11.65, 17.82, 18.33, 20.24, 22.70, 23.14, 27.00, 27.78, 30.54, 31.49, 32.08, 32.19, 32.27, 34.72, 34.82, 34.98, 35.30, 39.09, 39.41, 39.61, 41.40, 41.89, 50.01, 51.40, 55.61, 66.15, 70.32, 125.08, 125.08, 125.81, 130.2, 131.70, 136.36, 170.23, 172.78, 173.58

Compound 8. MS: [M+1] 611.3. <sup>13</sup>C NMR (DMSO-d6): δ 11.63, 18.33, 20.22, 21.18, 22.70, 23.12, 26.67, 27.76, 30.53, 31.49, 32.09, 32.25, 32.71, 34.72, 34.81, 34.97, 35.30, 39.09, 39.41, 39.61, 41.39, 41.89, 49.98, 51.32, 55.59, 66.13, 70.32, 116.21, 119.54, 123.63, 128.42, 137.72, 139.16, 170.22, 172.78, 173.54

Compound 9. MS: [M+1] 611.3. <sup>13</sup>C NMR (DMSO-d6): δ 11.63, 18.33, 20.22, 20.41, 22.70, 23.12, 26.69, 27.76, 30.54, 31.48, 32.11, 32.25, 32.68, 34.72, 34.81, 34.97, 35.30, 39.09, 39.41, 39.61, 41.40, 41.89, 49.99, 51.40, 55.59, 66.14, 70.32, 119.01, 119.01, 128.97, 128.97, 131.76, 136.75, 170.03, 172.78, 173.54

Compound 10. MS: [M+1] 627.2. <sup>13</sup>C NMR (DMSO-d6): δ 11.63, 18.33, 20.24, 22.70, 23.14, 26.94, 27.78, 30.54, 31.48, 32.09, 32.27, 32.67, 34.72, 34.82, 34.98, 35.30, 39.09, 39.41, 39.61, 41.41, 41.89, 49.99, 51.40, 55.61, 55.8, 66.15, 70.33, 111.08, 120.13, 121.99, 124.24, 127.31, 149.55, 170.52, 172.77, 173.56

Compound 11. MS: [M+1] 627.1. <sup>13</sup>C NMR (DMSO-d6): δ 11.64, 18.35, 20.25, 22.70, 23.15, 26.59, 27.78, 30.55, 31.49, 32.11, 32.27, 32.78, 34.72, 34.82, 34.99, 35.30, 39.09, 39.41, 39.61, 41.41, 41.89,

49.99, 51.38, 54.92, 55.60, 66.16, 70.32, 104.86, 108.34, 111.32, 129.39, 140.43, 159.44, 170.35, 172.78, 173.53

Compound 12. MS: [M+1] 627.4. <sup>13</sup>C NMR (DMSO-d6): δ 11.64, 18.35, 20.25, 22.70, 23.14, 26.75, 27.79, 30.54, 31.50, 32.12, 32.27, 32.59, 34.72, 34.82, 34.99, 35.29, 39.09, 39.41, 39.61, 41.41, 41.89, 50.002, 51.41, 55.11, 55.60, 66.16, 70.32, 113.73, 113.73, 120.54, 120.54, 132.43, 154.99, 169.75, 172.78, 173.54

Compound 13. MS: [M+1] 653.4. <sup>13</sup>C NMR (DMSO-d6): δ 11.66, 18.37, 20.25, 22.70, 23.15, 26.85, 27.79, 30.54, 30.76, 30.76, 31.53, 32.12, 32.27, 32.72, 34.72, 34.83, 34.99, 35.30, 39.09, 39.41, 39.61, 41.41, 41.91, 50.01, 51.44, 51.47, 55.64, 66.15, 70.32, 126.24, 126.46, 126.76, 131.79, 136.01, 146.42, 171.13, 172.78, 173.57

Compound 14. MS: [M+1] 653.5. <sup>13</sup>C NMR (DMSO-d6): δ 11.63, 18.35, 20.25, 22.70, 23.14, 26.74, 27.77, 30.54, 31.09, 31.09, 31.09, 31.53, 32.12, 32.26, 32.75, 34.72, 34.81, 34.97, 35.29, 39.09, 39.41, 39.61, 41.39, 41.90, 49.99, 51.36, 51.43, 55.61, 66.14, 70.32, 115.99, 116.28, 119.94, 128.22, 139.01, 151.04, 170.23, 172.72, 173.54

Compound 15. MS: [M+1] 653.5. <sup>13</sup>C NMR (DMSO-d6): δ 11.64, 18.35, 20.24, 22.70, 23.14, 26.71, 27.78, 30.54, 31.19, 31.19, 31.19, 31.49, 32.12, 32.26, 32.75, 33.94, 34.72, 34.81, 34.98, 35.29, 39.09, 39.41, 39.61, 41.40, 41.89, 50.00, 51.38, 55.62, 66.14, 70.31, 118.82, 118.82, 125.17, 125.17, 136.4, 145.22, 170.06, 172.77, 173.54

Compound 16. MS: [M+1] 655.3. <sup>13</sup>C NMR (DMSO-d6): δ 11.64, 18.35, 20.25, 22.71, 23.15, 26.59, 27.78, 30.56, 31.52, 32.21, 32.27, 32.74, 34.74, 34.81, 34.98, 35.30, 39.09, 39.41, 39.61, 41.42, 41.93, 50.01, 51.22, 51.40, 55.55, 66.18, 70.34, 117.52, 121.01, 123.08, 130.45, 133.93, 139.67, 167.6, 170.47, 172.75, 173.41

Compound 17. MS: [M+1] 655.4. <sup>13</sup>C NMR (DMSO-d6): δ 11.63, 18.33, 20.24, 22.70, 23.14, 26.58, 27.77, 30.54, 31.49, 32.13, 32.26, 32.72, 34.72, 34.82, 34.97, 35.30, 39.09, 39.41, 39.61, 41.41, 41.89, 49.99, 51.28, 51.31, 55.60, 66.14, 70.31, 119.49, 123.42, 123.58, 129.12, 130.02, 139.61, 166.11, 170.65, 172.78, 173.51

Compound 18. MS: [M+1] 655.4. <sup>13</sup>C NMR (DMSO-d6): δ 11.63, 18.31, 20.23, 22.70, 23.13, 26.48, 27.78, 30.54, 31.49, 32.16, 32.25, 32.72, 34.72, 34.82, 34.97, 35.30, 39.09, 39.41, 39.61, 41.40, 41.89, 49.99, 51.28, 51.79, 55.62, 66.14, 70.31, 118.21, 118.32, 123.64, 130.22, 130.32, 143.63, 165.81, 170.98, 172.77, 173.50

Compound 19. MS: [M+1] 669.3. <sup>13</sup>C NMR (DMSO-d6): δ 11.63, 13.98, 18.32, 20.23, 22.70, 23.13, 26.48, 27.73, 30.54, 31.52, 31.77, 32.25, 32.72, 34.72, 34.78, 34.93, 35.30, 39.09, 39.41, 39.61, 41.40, 41.92, 49.99, 51.11, 55.59, 57.91, 66.14, 70.31, 117.51, 120.92, 123.03, 130.46, 133.89, 139.75, 167.12, 170.98, 172.77, 173.50

Compound 20. MS: [M+1] 669.3. <sup>13</sup>C NMR (DMSO-d6): δ 11.63, 14.21, 18.32, 20.24, 22.69, 23.13, 26.48, 27.80, 30.54, 31.50, 32.17, 32.25, 32.86, 34.72, 34.81, 34.99, 35.30, 39.09, 39.41, 39.61, 41.41, 41.89, 49.99, 51.21, 55.62, 60.36, 66.15, 70.32, 118.30, 118.30, 123.94, 130.16, 130.16, 143.58, 165.32, 170.96, 172.78, 173.50

Compound 21. MS: [M+1] 712.2. <sup>13</sup>C NMR (DMSO-d6): δ 11.64, 18.35, 20.23, 22.70, 23.14, 26.72, 27.78, 28.12, 28.12, 28.12, 30.55, 31.49, 32.11, 32.26, 32.70, 34.72, 34.82, 34.98, 35.30, 39.09, 39.41, 39.61, 41.40, 41.89, 49.99, 51.39, 55.62, 66.14, 70.31, 78.88, 109.11, 113.04, 113.12, 128.58, 139.51, 139.76, 152.68, 170.22, 172.75, 173.55

Compound 22. MS: [M+1] 712.4. <sup>13</sup>C NMR (DMSO-d6): δ 11.63, 18.33, 20.23, 22.69, 23.13, 26.75, 27.78, 28.13, 28.13, 28.13, 30.53, 31.49, 32.16, 32.25, 32.61, 34.72, 34.81, 34.97, 35.29, 39.09, 39.41,

39.61, 41.40, 41.89, 49.99, 51.37, 55.61, 66.14, 70.31, 78.75, 118.34, 118.34, 119.48, 119.48, 133.75, 134.74, 152.78, 169.85, 172.74, 173.54

Compound 23. MS: [M+1] 612.5 <sup>13</sup>C NMR (DMSO-d6): δ 11.65, 18.37, 20.25, 22.72, 23.16, 26.70, 27.79, 30.55, 31.49, 32.12, 32.28, 32.79, 34.74, 34.84, 34.99, 35.31, 39.09, 39.41, 39.61, 41.42, 41.91, 50.02, 51.34, 55.63, 66.17, 70.33, 115.68, 121.18, 123.26, 125.52, 125.79, 142.09, 170.28, 172.81, 173.51

Compound 24. MS: [M+1] 612.1 <sup>13</sup>C NMR (DMSO-d6): δ 11.64, 18.36, 20.24, 22.70, 23.14, 26.63, 27.78, 30.53, 31.48, 32.06, 32.28, 32.79, 34.72, 34.82, 34.99, 35.29, 39.09, 39.41, 39.61, 41.40, 41.89, 50.01, 51.38, 55.61, 66.14, 70.29, 112.88, 113.69, 116.79, 117.29, 129.81, 140.34, 170.77, 172.81, 173.48

Compound 25. MS: [M+1] 612.5 <sup>13</sup>C NMR (DMSO-d6): δ 11.64, 18.35, 20.22, 22.70, 23.14, 26.89, 27.76, 30.54, 31.48, 32.06, 32.54, 34.72, 34.82, 34.99, 35.29, 39.09, 39.41, 39.61, 41.40, 41.89, 49.99, 51.45, 55.60, 66.16, 70.32, 114.18, 114.18, 120.79, 120.79, 129.08, 143.48, 169.31, 172.76, 173.57

Compound 26. MS: [M+1] 633.2 <sup>13</sup>C NMR (DMSO-d6): δ 11.63, 18.34, 20.24, 22.70, 23.13, 26.70, 27.77, 30.53, 31.48, 32.08, 32.26, 32.78, 34.72, 34.82, 34.97, 35.29, 39.09, 39.41, 39.61, 41.39, 41.89, 49.99, 51.33, 55.60, 66.14, 70.30, 104.02, 110.89, 122.82, 125.87, 152.96, 159.39, 170.74, 172.76, 173.51.

Compound 27. MS: [M+1] 625.4 <sup>13</sup>C NMR (DMSO-d6): δ 11.65, 18.07, 18.07, 18.37, 20.24, 22.69, 23.14, 27.21, 27.78, 30.53, 31.52, 32.08, 32.27, 32.78, 34.72, 34.82, 34.98, 35.30, 39.09, 39.41, 39.61, 41.41, 41.90, 50.01, 51.47, 55.63, 66.15, 70.3, 126.25, 127.56, 127.56, 135.13, 135.13, 135.21, 169.88, 172.79, 173.58

Compound 28 MS: [M+1] 625.5 <sup>13</sup>C NMR (DMSO-d6): δ 11.64, 13.96, 18.35, 20.12, 20.24, 22.69, 23.14, 27.02, 27.77, 30.52, 31.49, 32.10, 32.26, 32.78, 34.71, 34.81, 34.97, 35.28, 39.09, 39.41, 39.61, 41.39, 41.89, 50.00, 51.46, 55.60, 66.15, 70.30, 123.6, 125.05, 126.78, 131.13, 136.12, 136.78, 170.74, 172.76, 173.5

Compound 29. MS: [M+1] 657.3 <sup>13</sup>C NMR (DMSO-d6): δ 11.63, 18.33, 20.24, 22.68, 23.13, 26.58, 27.78, 30.54, 31.49, 32.13, 32.26, 32.8, 34.71, 34.82, 34.98, 35.30, 39.09, 39.41, 39.61, 41.40, 41.89, 49.99, 51.35, 54.97, 55.01, 55.61, 66.15, 70.32, 94.98, 97.34, 97.36, 140.48, 160.40, 160.40, 170.39, 172.76, 173.53

Compound 30. MS: [M+1] 731.6 <sup>13</sup>C NMR (DMSO-d6): δ 11.61, 18.31, 20.23, 22.69, 23.13, 26.23, 27.76, 30.55, 31.49, 32.05, 32.27, 32.48, 34.73, 34.96, 35.30, 39.09, 39.41, 39.61, 41.40, 41.90, 50.0030, 51.58, 55.59, 65.87, 66.17, 70.35, 119.78, 123.05, 123.81, 127.72, 127.72, 127.98, 128.38, 128.38, 128.89, 131.23, 135.98, 139.41, 167.16, 170.42, 171.92, 173.02

Compound 31. MS: [M-1] 639.5 <sup>13</sup>C NMR (DMSO-d6): δ 11.63, 18.34, 20.23, 22.70, 23.14, 26.35, 27.77, 30.55, 31.49, 32.13, 32.27, 32.66, 34.74, 34.82, 34.93, 35.31, 39.09, 39.41, 39.61, 41.42, 41.92, 49.99, 51.21, 55.62, 66.17, 70.33, 116.28, 119.90, 122.53, 131.06, 134.05, 140.40, 169.49, 170.37, 172.79, 173.42

Compound 32. MS: [M-1] 639.4 <sup>13</sup>C NMR (DMSO-d6): δ 11.64, 18.35, 20.24, 22.71, 23.15, 26.57, 27.78, 30.54, 31.49, 32.12, 32.27, 32.72, 34.73, 34.82, 34.97, 35.31, 39.09, 39.41, 39.61, 41.42, 41.90, 50.003, 51.30, 55.62, 66.17, 70.32, 119.78, 123.11, 123.8, 128.91, 131.19, 139.45, 167.16, 170.61, 172.81, 173.51

Compound 33. MS: [M-1] 639.5 <sup>13</sup>C NMR (DMSO-d6): δ 11.65, 18.37, 20.25, 22.72, 23.16, 26.50, 27.81, 30.57, 31.51, 32.13, 32.28, 32.85, 34.74, 34.83, 34.98, 35.31, 39.09, 39.41, 39.61, 41.43,

41.92, 50.02, 51.30, 55.64, 66.17, 70.32, 118.14, 118.35, 125.84, 130.37, 130.37, 143.29, 166.92, 170.90, 172.82, 173.5

Compound 34. MS: [M-1] 653.6 <sup>13</sup>C NMR (DMSO-d6): δ 11.64, 18.35, 20.25, 22.72, 23.15, 27.06, 27.79, 30.55, 31.50, 32.07, 32.29, 32.81, 34.73, 34.82, 35.0003, 35.32, 39.09, 39.41, 39.61, 41.42, 41.79, 41.90, 50.02, 51.55, 55.63, 66.17, 70.34, 128.01, 128.13, 128.52, 130.92, 131.69, 140.13, 167.30, 171.43, 172.75, 173.53

Compound 35. MS: [M-1] 653.4 <sup>13</sup>C NMR (DMSO-d6): δ 11.65, 18.37, 20.25, 22.72, 23.15, 26.94, 27.79, 30.55, 31.50, 32.08, 32.29, 32.81, 34.74, 34.81, 34.99, 35.31, 39.09, 39.41, 39.61, 41.42, 41.81, 41.92, 50.02, 51.41, 55.63, 66.14, 70.31, 127.13, 127.13, 129.19, 129.37, 129.41, 144.83, 167.15, 171.43, 172.78, 173.55

Note: Peaks 39.09, 39.41, 39.61 were obscured by DMSO-d6 solvent, obtained from HMQC spectra of **32**.

**Table S2.** Elemental analysis results for **1-35**.

| Compound <sup>a</sup> | Theoretical % |      |      | Found % |      |      | Consistent Formula                                                                                      |
|-----------------------|---------------|------|------|---------|------|------|---------------------------------------------------------------------------------------------------------|
|                       | C             | H    | N    | C       | H    | N    |                                                                                                         |
| 1                     | 68.49         | 8.70 | 4.56 | 68.75   | 8.87 | 4.53 | C <sub>35</sub> H <sub>52</sub> N <sub>2</sub> O <sub>6</sub><br>+ 1.0 H <sub>2</sub> O                 |
| 2                     | 65.71         | 8.11 | 4.38 | 65.46   | 8.23 | 4.34 | C <sub>35</sub> H <sub>51</sub> ClN <sub>2</sub> O <sub>6</sub><br>+ 0.5 H <sub>2</sub> O               |
| 3                     | 63.03         | 7.68 | 4.08 | 62.76   | 7.74 | 4.16 | C <sub>36</sub> H <sub>51</sub> F <sub>3</sub> N <sub>2</sub> O <sub>6</sub><br>+ 1.25 H <sub>2</sub> O |
| 4                     | 66.54         | 8.29 | 4.43 | 66.30   | 8.30 | 4.47 | C <sub>35</sub> H <sub>51</sub> FN <sub>2</sub> O <sub>6</sub><br>+ 1.0 H <sub>2</sub> O                |
| 5                     | 66.54         | 8.29 | 4.43 | 66.53   | 8.26 | 4.50 | C <sub>35</sub> H <sub>51</sub> FN <sub>2</sub> O <sub>6</sub><br>+ 1.0 H <sub>2</sub> O                |
| 6                     | 67.44         | 8.33 | 4.50 | 67.11   | 8.33 | 4.48 | C <sub>35</sub> H <sub>51</sub> FN <sub>2</sub> O <sub>6</sub><br>+ 0.5 H <sub>2</sub> O                |
| 7                     | 70.27         | 8.93 | 4.55 | 70.26   | 8.85 | 4.27 | C <sub>36</sub> H <sub>54</sub> N <sub>2</sub> O <sub>6</sub><br>+ 0.5 H <sub>2</sub> O                 |
| 8                     | 68.87         | 8.83 | 4.46 | 68.54   | 8.70 | 4.53 | C <sub>36</sub> H <sub>54</sub> N <sub>2</sub> O <sub>6</sub><br>+ 1.0 H <sub>2</sub> O                 |
| 9                     | 67.44         | 8.87 | 4.25 | 67.69   | 8.79 | 3.88 | C <sub>36</sub> H <sub>54</sub> N <sub>2</sub> O <sub>6</sub><br>+ 2.0 CH <sub>3</sub> OH               |
| 10                    | 66.28         | 8.58 | 4.29 | 66.11   | 8.42 | 4.43 | C <sub>36</sub> H <sub>54</sub> N <sub>2</sub> O <sub>7</sub><br>+ 1.5 H <sub>2</sub> O                 |
| 11                    | 67.16         | 8.61 | 4.35 | 67.19   | 8.41 | 4.66 | C <sub>36</sub> H <sub>54</sub> N <sub>2</sub> O <sub>7</sub><br>+ 1.0 H <sub>2</sub> O                 |
| 12                    | 68.05         | 8.65 | 4.41 | 67.98   | 8.70 | 4.33 | C <sub>36</sub> H <sub>54</sub> N <sub>2</sub> O <sub>7</sub><br>+ 0.5 H <sub>2</sub> O                 |
| 13                    | 69.92         | 9.18 | 4.18 | 69.59   | 9.27 | 4.29 | C <sub>39</sub> H <sub>60</sub> N <sub>2</sub> O <sub>6</sub><br>+ 1.0 H <sub>2</sub> O                 |
| 14                    | 70.36         | 9.20 | 4.20 | 70.15   | 9.20 | 4.17 | C <sub>39</sub> H <sub>60</sub> N <sub>2</sub> O <sub>6</sub><br>+ 1.0 H <sub>2</sub> O                 |
| 15                    | 70.82         | 9.22 | 4.24 | 70.73   | 9.11 | 4.42 | C <sub>39</sub> H <sub>60</sub> N <sub>2</sub> O <sub>6</sub><br>+ 0.75H <sub>2</sub> O                 |
| 16                    | 66.15         | 8.25 | 4.17 | 66.52   | 8.47 | 4.18 | C <sub>37</sub> H <sub>54</sub> N <sub>2</sub> O <sub>8</sub><br>+ 0.5 H <sub>2</sub> O                 |
| 17                    | 66.99         | 8.29 | 4.22 | 66.75   | 8.32 | 4.20 | C <sub>37</sub> H <sub>54</sub> N <sub>2</sub> O <sub>8</sub><br>+ 0.5 H <sub>2</sub> O                 |
| 18                    | 66.64         | 8.16 | 4.20 | 66.38   | 8.32 | 4.44 | C <sub>37</sub> H <sub>54</sub> N <sub>2</sub> O <sub>8</sub><br>+ 0.75 H <sub>2</sub> O                |
| 19                    | 65.32         | 8.33 | 4.01 | 65.08   | 8.46 | 3.79 | C <sub>38</sub> H <sub>56</sub> N <sub>2</sub> O <sub>8</sub><br>+ 1.75 H <sub>2</sub> O                |
| 20                    | 67.81         | 8.42 | 4.16 | 67.45   | 8.61 | 3.82 | C <sub>38</sub> H <sub>56</sub> N <sub>2</sub> O <sub>8</sub><br>+ 0.25 H <sub>2</sub> O                |
| 21                    | 65.82         | 8.70 | 5.76 | 65.48   | 8.66 | 5.97 | C <sub>40</sub> H <sub>61</sub> N <sub>3</sub> O <sub>8</sub><br>+1.5 H <sub>2</sub> O                  |
| 22                    | 64.26         | 8.51 | 5.62 | 64.01   | 8.11 | 6.02 | C <sub>40</sub> H <sub>61</sub> N <sub>3</sub> O <sub>8</sub><br>+2.0 H <sub>2</sub> O                  |
| 23                    | 63.83         | 8.53 | 6.38 | 63.43   | 8.23 | 6.30 | C <sub>35</sub> H <sub>53</sub> N <sub>3</sub> O <sub>6</sub><br>+ 2.75 H <sub>2</sub> O                |

|    |       |      |      |       |      |      |                                          |
|----|-------|------|------|-------|------|------|------------------------------------------|
| 24 | 67.77 | 8.69 | 6.77 | 67.68 | 8.55 | 6.64 | $C_{35}H_{53}N_3O_6$<br>+ 0.5 $H_2O$     |
| 25 | 67.31 | 8.67 | 6.73 | 67.14 | 8.74 | 6.63 | $C_{35}H_{53}N_3O_6$<br>+ 0.75 $H_2O$    |
| 26 | 64.28 | 7.90 | 4.28 | 64.05 | 7.59 | 4.60 | $C_{35}H_{50}F_2N_2O_6$<br>+ 1.25 $H_2O$ |
| 27 | 69.24 | 8.95 | 4.36 | 69.49 | 8.93 | 4.43 | $C_{37}H_{56}N_2O_6$<br>+ 1.0 $H_2O$     |
| 28 | 68.78 | 8.93 | 4.34 | 68.77 | 8.97 | 4.45 | $C_{37}H_{56}N_2O_6$<br>+ 1.25 $H_2O$    |
| 29 | 65.94 | 8.52 | 4.16 | 66.21 | 8.55 | 4.38 | $C_{37}H_{56}N_2O_8$<br>+ 0.5 $H_2O$     |
| 30 | 68.28 | 7.93 | 3.70 | 68.25 | 7.88 | 3.75 | $C_{43}H_{58}N_2O_8$<br>+ 1.25 $H_2O$    |
| 31 | 66.16 | 8.14 | 4.29 | 65.78 | 8.28 | 4.32 | $C_{36}H_{52}N_2O_8$<br>+ 0.75 $H_2O$    |
| 32 | 65.73 | 8.12 | 4.25 | 65.60 | 8.22 | 4.29 | $C_{36}H_{52}N_2O_8$<br>+ 1.0 $H_2O$     |
| 33 | 64.89 | 8.09 | 4.20 | 64.69 | 8.16 | 4.09 | $C_{36}H_{52}N_2O_8$<br>+ 1.5 $H_2O$     |
| 34 | 65.32 | 8.22 | 4.11 | 65.25 | 8.39 | 3.92 | $C_{37}H_{54}N_2O_8$<br>+ 1.5 $H_2O$     |
| 35 | 65.32 | 8.22 | 4.11 | 64.93 | 7.91 | 3.89 | $C_{37}H_{54}N_2O_8$<br>+ 1.5 $H_2O$     |

---



**Table S3.** Correlation matrix of structural descriptors for aniline conjugates of glu-CDCA.

|                       | $\Delta G_w$ | $\log P_c$ | C18-GS-O7 | C19-GS-O3 | O7-C18-GS | O7-AA | O7-AA-C20 | O7-AA-GS | HA    | O3-C18-GS | O7-C19-GS | O7-GS <sub>min</sub> | PSA <sub>side</sub> | O7-GS |
|-----------------------|--------------|------------|-----------|-----------|-----------|-------|-----------|----------|-------|-----------|-----------|----------------------|---------------------|-------|
| $\Delta G_w$          | 1.00         |            |           |           |           |       |           |          |       |           |           |                      |                     |       |
| $\log P_c$            | 0.93         | 1.00       |           |           |           |       |           |          |       |           |           |                      |                     |       |
| C18-GS-O7             | 0.56         | 0.44       | 1.00      |           |           |       |           |          |       |           |           |                      |                     |       |
| C19-GS-O3             | 0.53         | 0.44       | 0.65      | 1.00      |           |       |           |          |       |           |           |                      |                     |       |
| O7-C18-GS             | 0.47         | 0.45       | 0.43      | 0.90      | 1.00      |       |           |          |       |           |           |                      |                     |       |
| O7-AA                 | 0.49         | 0.45       | 0.37      | 0.82      | 0.86      | 1.00  |           |          |       |           |           |                      |                     |       |
| O7-AA-C20             | 0.48         | 0.43       | 0.30      | 0.81      | 0.87      | 0.99  | 1.00      |          |       |           |           |                      |                     |       |
| O7-AA-GS              | 0.44         | 0.35       | 0.77      | 0.93      | 0.83      | 0.73  | 0.69      | 1.00     |       |           |           |                      |                     |       |
| HA                    | -0.42        | -0.44      | -0.10     | -0.11     | -0.08     | 0.02  | 0.02      | 0.00     | 1.00  |           |           |                      |                     |       |
| O3-C18-GS             | 0.41         | 0.37       | 0.53      | 0.94      | 0.94      | 0.84  | 0.82      | 0.90     | -0.04 | 1.00      |           |                      |                     |       |
| O7-C19-GS             | 0.39         | 0.33       | 0.54      | 0.94      | 0.93      | 0.80  | 0.79      | 0.89     | -0.01 | 0.95      | 1.00      |                      |                     |       |
| O7-GS <sub>min</sub>  | 0.43         | 0.30       | 0.80      | 0.87      | 0.75      | 0.68  | 0.64      | 0.97     | 0.00  | 0.84      | 0.82      | 1.00                 |                     |       |
| PSA <sub>side</sub>   | -0.27        | -0.35      | 0.08      | -0.08     | -0.17     | -0.16 | -0.19     | 0.07     | 0.11  | -0.07     | -0.06     | 0.16                 | 1.00                |       |
| O7-GS                 | 0.42         | 0.32       | 0.80      | 0.88      | 0.78      | 0.70  | 0.67      | 0.97     | 0.03  | 0.85      | 0.84      | 0.98                 | 0.13                | 1.00  |
| O3-AA-GS              | 0.40         | 0.30       | 0.78      | 0.90      | 0.78      | 0.72  | 0.67      | 0.99     | 0.05  | 0.88      | 0.87      | 0.97                 | 0.12                | 0.97  |
| C18-GS-O3             | 0.41         | 0.32       | 0.71      | 0.94      | 0.81      | 0.75  | 0.72      | 0.96     | 0.06  | 0.93      | 0.92      | 0.92                 | 0.06                | 0.92  |
| O3-GS <sub>min</sub>  | 0.41         | 0.28       | 0.79      | 0.88      | 0.75      | 0.69  | 0.66      | 0.96     | 0.02  | 0.85      | 0.84      | 0.99                 | 0.16                | 0.97  |
| BC-GS <sub>min</sub>  | 0.42         | 0.30       | 0.80      | 0.81      | 0.69      | 0.62  | 0.59      | 0.92     | -0.01 | 0.77      | 0.78      | 0.97                 | 0.22                | 0.96  |
| AA-GS-O3              | 0.41         | 0.27       | 0.90      | 0.75      | 0.57      | 0.54  | 0.50      | 0.89     | 0.07  | 0.67      | 0.70      | 0.93                 | 0.17                | 0.93  |
| O3-GS                 | 0.39         | 0.29       | 0.78      | 0.89      | 0.79      | 0.71  | 0.67      | 0.97     | 0.06  | 0.87      | 0.87      | 0.97                 | 0.13                | 0.99  |
| GS-O7-C18             | 0.34         | 0.30       | 0.49      | 0.92      | 0.96      | 0.85  | 0.85      | 0.89     | 0.06  | 0.96      | 0.97      | 0.84                 | -0.04               | 0.87  |
| O3-GS <sub>max</sub>  | 0.38         | 0.30       | 0.79      | 0.82      | 0.73      | 0.64  | 0.60      | 0.92     | 0.11  | 0.78      | 0.80      | 0.91                 | 0.12                | 0.95  |
| C19-GS <sub>min</sub> | 0.41         | 0.27       | 0.81      | 0.82      | 0.70      | 0.66  | 0.63      | 0.93     | 0.02  | 0.78      | 0.79      | 0.96                 | 0.19                | 0.96  |
| C18-GS <sub>min</sub> | 0.40         | 0.27       | 0.82      | 0.76      | 0.63      | 0.60  | 0.56      | 0.90     | 0.05  | 0.72      | 0.73      | 0.94                 | 0.21                | 0.94  |
| O7-GS <sub>max</sub>  | 0.38         | 0.30       | 0.81      | 0.81      | 0.71      | 0.63  | 0.59      | 0.92     | 0.10  | 0.76      | 0.78      | 0.92                 | 0.13                | 0.97  |
| O3-AA-C20             | 0.32         | 0.29       | 0.32      | 0.85      | 0.92      | 0.94  | 0.94      | 0.78     | 0.09  | 0.91      | 0.87      | 0.73                 | -0.09               | 0.74  |
| BC-GS                 | 0.39         | 0.29       | 0.81      | 0.80      | 0.70      | 0.62  | 0.58      | 0.92     | 0.02  | 0.77      | 0.78      | 0.94                 | 0.20                | 0.97  |
| AA-GS-O7              | 0.38         | 0.27       | 0.88      | 0.80      | 0.64      | 0.57  | 0.53      | 0.92     | 0.05  | 0.73      | 0.74      | 0.95                 | 0.19                | 0.96  |
| O7-AA-BC              | 0.38         | 0.30       | 0.40      | 0.82      | 0.79      | 0.94  | 0.94      | 0.72     | 0.07  | 0.81      | 0.80      | 0.67                 | -0.09               | 0.70  |
| BC-GS <sub>max</sub>  | 0.36         | 0.28       | 0.80      | 0.74      | 0.65      | 0.56  | 0.52      | 0.87     | 0.07  | 0.71      | 0.72      | 0.88                 | 0.17                | 0.93  |

Table S3. Contd.

|                             | $\Delta G_w$ | $\log P_c$ | C18-GS-O7 | C19-GS-O3 | O7-C18-GS | O7-AA | O7-AA-C20 | O7-AA-GS | HA    | O3-C18-GS | O7-C19-GS | O7-GS <sub>min</sub> | PSA <sub>side</sub> | O7-GS |
|-----------------------------|--------------|------------|-----------|-----------|-----------|-------|-----------|----------|-------|-----------|-----------|----------------------|---------------------|-------|
| <b>PSA</b>                  | -0.20        | -0.28      | 0.13      | 0.12      | 0.05      | 0.06  | 0.03      | 0.24     | 0.11  | 0.15      | 0.14      | 0.33                 | 0.97                | 0.29  |
| <b>C19-GS</b>               | 0.38         | 0.28       | 0.80      | 0.79      | 0.68      | 0.64  | 0.60      | 0.91     | 0.05  | 0.77      | 0.77      | 0.93                 | 0.19                | 0.95  |
| <b>O7-AA-C18</b>            | 0.37         | 0.26       | 0.56      | 0.85      | 0.74      | 0.86  | 0.84      | 0.80     | 0.10  | 0.82      | 0.84      | 0.76                 | 0.00                | 0.77  |
| <b>GS-O3-C18</b>            | 0.30         | 0.23       | 0.53      | 0.88      | 0.91      | 0.81  | 0.80      | 0.89     | 0.07  | 0.94      | 0.91      | 0.87                 | 0.01                | 0.89  |
| <b>O3-C19-GS</b>            | 0.30         | 0.22       | 0.32      | 0.85      | 0.90      | 0.83  | 0.85      | 0.79     | 0.02  | 0.88      | 0.87      | 0.73                 | -0.06               | 0.74  |
| <b>C18-GS</b>               | 0.36         | 0.27       | 0.79      | 0.73      | 0.64      | 0.58  | 0.54      | 0.87     | 0.03  | 0.70      | 0.70      | 0.89                 | 0.23                | 0.93  |
| <b>C19-GS<sub>max</sub></b> | 0.34         | 0.27       | 0.78      | 0.68      | 0.58      | 0.52  | 0.47      | 0.81     | 0.06  | 0.65      | 0.65      | 0.82                 | 0.18                | 0.88  |
| <b>SASA</b>                 | 0.26         | 0.30       | 0.52      | 0.46      | 0.48      | 0.52  | 0.48      | 0.55     | 0.43  | 0.51      | 0.45      | 0.52                 | -0.21               | 0.61  |
| <b>O3-AA</b>                | 0.23         | 0.22       | 0.24      | 0.76      | 0.83      | 0.93  | 0.91      | 0.69     | 0.11  | 0.84      | 0.78      | 0.66                 | -0.04               | 0.68  |
| <b>BC-AA</b>                | 0.23         | 0.17       | 0.45      | 0.79      | 0.70      | 0.85  | 0.79      | 0.75     | 0.11  | 0.82      | 0.76      | 0.72                 | -0.02               | 0.72  |
| <b>C18-GS<sub>max</sub></b> | 0.33         | 0.25       | 0.76      | 0.64      | 0.54      | 0.48  | 0.44      | 0.78     | 0.06  | 0.59      | 0.60      | 0.80                 | 0.22                | 0.86  |
| <b>GS-O7-C19</b>            | 0.23         | 0.13       | 0.63      | 0.77      | 0.64      | 0.55  | 0.52      | 0.83     | 0.15  | 0.75      | 0.85      | 0.79                 | 0.11                | 0.80  |
| <b>C19-GS-O7</b>            | 0.27         | 0.18       | 0.72      | 0.57      | 0.49      | 0.47  | 0.43      | 0.76     | 0.10  | 0.55      | 0.54      | 0.80                 | 0.26                | 0.84  |
| <b>GS-O7-AA</b>             | 0.21         | 0.21       | 0.30      | 0.34      | 0.38      | 0.39  | 0.37      | 0.42     | -0.01 | 0.33      | 0.30      | 0.45                 | 0.10                | 0.53  |
| <b>O7-AA-C19</b>            | -0.15        | -0.25      | 0.41      | 0.55      | 0.36      | 0.50  | 0.45      | 0.60     | 0.30  | 0.55      | 0.55      | 0.62                 | 0.23                | 0.61  |
| <b>O3-AA-C18</b>            | 0.15         | 0.07       | 0.40      | 0.81      | 0.76      | 0.85  | 0.84      | 0.80     | 0.20  | 0.84      | 0.83      | 0.78                 | 0.07                | 0.79  |
| <b>O3-AA-C19</b>            | 0.16         | 0.12       | 0.32      | 0.74      | 0.76      | 0.83  | 0.84      | 0.70     | 0.11  | 0.80      | 0.77      | 0.69                 | -0.04               | 0.71  |
| <b>GS-O3-C19</b>            | 0.16         | 0.05       | 0.50      | 0.81      | 0.77      | 0.73  | 0.72      | 0.86     | 0.20  | 0.85      | 0.84      | 0.82                 | 0.11                | 0.83  |
| <b>HD</b>                   | 0.09         | -0.05      | 0.12      | -0.06     | -0.16     | 0.00  | 0.01      | -0.06    | 0.12  | -0.12     | -0.15     | 0.03                 | 0.25                | 0.03  |
| <b>C19-AA</b>               | 0.13         | 0.03       | 0.50      | 0.71      | 0.51      | 0.68  | 0.63      | 0.70     | 0.22  | 0.68      | 0.67      | 0.67                 | 0.07                | 0.67  |
| <b>SASAS<sub>side</sub></b> | 0.07         | 0.18       | 0.18      | -0.06     | 0.04      | 0.10  | 0.07      | 0.02     | 0.40  | 0.00      | -0.05     | -0.03                | -0.30               | 0.09  |
| <b>MR</b>                   | 0.12         | 0.03       | 0.22      | 0.07      | 0.05      | -0.06 | -0.05     | 0.06     | -0.20 | 0.04      | 0.02      | 0.03                 | -0.13               | 0.06  |
| <b>KierFlex</b>             | 0.11         | 0.03       | 0.18      | 0.00      | 0.00      | -0.09 | -0.07     | -0.01    | -0.20 | -0.02     | -0.05     | -0.02                | -0.18               | 0.00  |
| <b>O3-AA-BC</b>             | 0.05         | -0.01      | 0.32      | 0.72      | 0.69      | 0.79  | 0.78      | 0.73     | 0.24  | 0.77      | 0.74      | 0.73                 | 0.07                | 0.74  |
| <b>GS-O3-AA</b>             | 0.05         | 0.07       | 0.32      | 0.32      | 0.33      | 0.36  | 0.35      | 0.42     | 0.18  | 0.32      | 0.26      | 0.47                 | 0.08                | 0.54  |
| <b>brofN</b>                | 0.03         | -0.03      | 0.11      | -0.08     | -0.09     | -0.21 | -0.20     | -0.08    | -0.21 | -0.10     | -0.16     | -0.09                | -0.16               | -0.09 |
| <b>MW</b>                   | 0.03         | -0.04      | 0.15      | -0.04     | -0.08     | -0.22 | -0.20     | -0.03    | -0.21 | -0.08     | -0.10     | -0.04                | -0.09               | -0.03 |
| <b>C18-AA</b>               | 0.02         | -0.10      | 0.56      | 0.59      | 0.32      | 0.41  | 0.36      | 0.65     | 0.21  | 0.54      | 0.58      | 0.63                 | 0.19                | 0.62  |

Table S3. Contd.

|                             | <b>O3-AA-<br/>GS</b> | <b>C18-<br/>GS-O3</b> | <b>O3-GS<sub>min</sub></b> | <b>BC-<br/>GS<sub>min</sub></b> | <b>AA-<br/>GS-O3</b> | <b>O3-<br/>GS</b> | <b>GS-O7-<br/>C18</b> | <b>O3-<br/>GS<sub>max</sub></b> | <b>C19-<br/>GS<sub>min</sub></b> | <b>C18-<br/>GS<sub>min</sub></b> | <b>O7-<br/>GS<sub>max</sub></b> | <b>O3-AA-<br/>C20</b> | <b>BC-<br/>GS</b> | <b>AA-GS-<br/>O7</b> |
|-----------------------------|----------------------|-----------------------|----------------------------|---------------------------------|----------------------|-------------------|-----------------------|---------------------------------|----------------------------------|----------------------------------|---------------------------------|-----------------------|-------------------|----------------------|
| <b>O3-AA-GS</b>             | 1.00                 |                       |                            |                                 |                      |                   |                       |                                 |                                  |                                  |                                 |                       |                   |                      |
| <b>C18-GS-O3</b>            | 0.96                 | 1.00                  |                            |                                 |                      |                   |                       |                                 |                                  |                                  |                                 |                       |                   |                      |
| <b>O3-GS<sub>min</sub></b>  | 0.97                 | 0.93                  | 1.00                       |                                 |                      |                   |                       |                                 |                                  |                                  |                                 |                       |                   |                      |
| <b>BC-GS<sub>min</sub></b>  | 0.95                 | 0.88                  | 0.97                       | 1.00                            |                      |                   |                       |                                 |                                  |                                  |                                 |                       |                   |                      |
| <b>AA-GS-O3</b>             | 0.92                 | 0.85                  | 0.93                       | 0.94                            | 1.00                 |                   |                       |                                 |                                  |                                  |                                 |                       |                   |                      |
| <b>O3-GS</b>                | 0.98                 | 0.94                  | 0.98                       | 0.96                            | 0.92                 | 1.00              |                       |                                 |                                  |                                  |                                 |                       |                   |                      |
| <b>GS-O7-C18</b>            | 0.88                 | 0.90                  | 0.85                       | 0.80                            | 0.70                 | 0.89              | 1.00                  |                                 |                                  |                                  |                                 |                       |                   |                      |
| <b>O3-GS<sub>max</sub></b>  | 0.94                 | 0.87                  | 0.92                       | 0.93                            | 0.90                 | 0.97              | 0.83                  | 1.00                            |                                  |                                  |                                 |                       |                   |                      |
| <b>C19-GS<sub>min</sub></b> | 0.96                 | 0.89                  | 0.97                       | 0.99                            | 0.95                 | 0.96              | 0.81                  | 0.92                            | 1.00                             |                                  |                                 |                       |                   |                      |
| <b>C18-GS<sub>min</sub></b> | 0.93                 | 0.85                  | 0.95                       | 0.99                            | 0.96                 | 0.94              | 0.76                  | 0.92                            | 0.99                             | 1.00                             |                                 |                       |                   |                      |
| <b>O7-GS<sub>max</sub></b>  | 0.94                 | 0.86                  | 0.92                       | 0.94                            | 0.93                 | 0.96              | 0.81                  | 0.98                            | 0.93                             | 0.93                             | 1.00                            |                       |                   |                      |
| <b>O3-AA-C20</b>            | 0.76                 | 0.80                  | 0.74                       | 0.65                            | 0.55                 | 0.75              | 0.93                  | 0.66                            | 0.68                             | 0.61                             | 0.64                            | 1.00                  |                   |                      |
| <b>BC-GS</b>                | 0.95                 | 0.86                  | 0.94                       | 0.97                            | 0.93                 | 0.97              | 0.81                  | 0.97                            | 0.96                             | 0.96                             | 0.98                            | 0.63                  | 1.00              |                      |
| <b>AA-GS-O7</b>             | 0.94                 | 0.87                  | 0.95                       | 0.95                            | 0.97                 | 0.94              | 0.75                  | 0.93                            | 0.96                             | 0.95                             | 0.95                            | 0.60                  | 0.95              | 1.00                 |
| <b>O7-AA-BC</b>             | 0.72                 | 0.78                  | 0.71                       | 0.64                            | 0.59                 | 0.72              | 0.83                  | 0.67                            | 0.70                             | 0.63                             | 0.65                            | 0.88                  | 0.64              | 0.61                 |
| <b>BC-GS<sub>max</sub></b>  | 0.90                 | 0.81                  | 0.88                       | 0.93                            | 0.91                 | 0.93              | 0.75                  | 0.98                            | 0.92                             | 0.93                             | 0.98                            | 0.56                  | 0.98              | 0.92                 |
| <b>PSA</b>                  | 0.28                 | 0.23                  | 0.32                       | 0.36                            | 0.27                 | 0.30              | 0.18                  | 0.26                            | 0.33                             | 0.33                             | 0.27                            | 0.14                  | 0.34              | 0.31                 |
| <b>C19-GS</b>               | 0.95                 | 0.87                  | 0.94                       | 0.97                            | 0.94                 | 0.96              | 0.80                  | 0.96                            | 0.97                             | 0.97                             | 0.96                            | 0.64                  | 0.99              | 0.94                 |
| <b>O7-AA-C18</b>            | 0.81                 | 0.87                  | 0.79                       | 0.73                            | 0.71                 | 0.80              | 0.83                  | 0.74                            | 0.79                             | 0.73                             | 0.73                            | 0.81                  | 0.73              | 0.72                 |
| <b>GS-O3-C18</b>            | 0.88                 | 0.88                  | 0.88                       | 0.82                            | 0.72                 | 0.90              | 0.96                  | 0.83                            | 0.84                             | 0.79                             | 0.82                            | 0.91                  | 0.82              | 0.78                 |
| <b>O3-C19-GS</b>            | 0.75                 | 0.77                  | 0.75                       | 0.67                            | 0.53                 | 0.76              | 0.90                  | 0.68                            | 0.69                             | 0.62                             | 0.65                            | 0.92                  | 0.66              | 0.61                 |
| <b>C18-GS</b>               | 0.90                 | 0.80                  | 0.90                       | 0.95                            | 0.92                 | 0.93              | 0.75                  | 0.94                            | 0.95                             | 0.96                             | 0.96                            | 0.58                  | 0.99              | 0.92                 |
| <b>C19-GS<sub>max</sub></b> | 0.86                 | 0.76                  | 0.84                       | 0.90                            | 0.88                 | 0.89              | 0.69                  | 0.94                            | 0.90                             | 0.91                             | 0.94                            | 0.50                  | 0.96              | 0.88                 |
| <b>SASA</b>                 | 0.56                 | 0.55                  | 0.51                       | 0.50                            | 0.59                 | 0.60              | 0.54                  | 0.65                            | 0.52                             | 0.53                             | 0.66                            | 0.51                  | 0.58              | 0.57                 |
| <b>O3-AA</b>                | 0.69                 | 0.71                  | 0.68                       | 0.59                            | 0.48                 | 0.69              | 0.87                  | 0.61                            | 0.63                             | 0.56                             | 0.59                            | 0.96                  | 0.58              | 0.53                 |
| <b>BC-AA</b>                | 0.77                 | 0.81                  | 0.74                       | 0.66                            | 0.63                 | 0.76              | 0.80                  | 0.69                            | 0.72                             | 0.66                             | 0.67                            | 0.83                  | 0.66              | 0.64                 |
| <b>C18-GS<sub>max</sub></b> | 0.82                 | 0.71                  | 0.81                       | 0.88                            | 0.85                 | 0.86              | 0.65                  | 0.93                            | 0.87                             | 0.89                             | 0.93                            | 0.46                  | 0.95              | 0.87                 |
| <b>GS-O7-C19</b>            | 0.86                 | 0.87                  | 0.82                       | 0.81                            | 0.79                 | 0.84              | 0.78                  | 0.81                            | 0.82                             | 0.81                             | 0.78                            | 0.61                  | 0.81              | 0.77                 |
| <b>C19-GS-O7</b>            | 0.81                 | 0.68                  | 0.81                       | 0.89                            | 0.88                 | 0.84              | 0.62                  | 0.87                            | 0.89                             | 0.91                             | 0.89                            | 0.47                  | 0.92              | 0.86                 |
| <b>GS-O7-AA</b>             | 0.44                 | 0.30                  | 0.45                       | 0.52                            | 0.40                 | 0.53              | 0.44                  | 0.59                            | 0.49                             | 0.52                             | 0.57                            | 0.36                  | 0.60              | 0.42                 |

**Table S3. Contd.**

|                            | <b>O3-AA-<br/>GS</b> | <b>C18-<br/>GS-O3</b> | <b>O3-<br/>GS<sub>min</sub></b> | <b>BC-<br/>GS<sub>min</sub></b> | <b>AA-<br/>GS-O3</b> | <b>O3-<br/>GS</b> | <b>GS-O7-<br/>C18</b> | <b>O3-<br/>GS<sub>max</sub></b> | <b>C19-<br/>GS<sub>min</sub></b> | <b>C18-<br/>GS<sub>min</sub></b> | <b>O7-<br/>GS<sub>max</sub></b> | <b>O3-AA-<br/>C20</b> | <b>BC-GS</b> | <b>AA-GS-<br/>O7</b> |
|----------------------------|----------------------|-----------------------|---------------------------------|---------------------------------|----------------------|-------------------|-----------------------|---------------------------------|----------------------------------|----------------------------------|---------------------------------|-----------------------|--------------|----------------------|
| <b>O7-AA-C19</b>           | 0.67                 | 0.68                  | 0.66                            | 0.61                            | 0.63                 | 0.65              | 0.57                  | 0.62                            | 0.67                             | 0.63                             | 0.60                            | 0.53                  | 0.60         | 0.62                 |
| <b>O3-AA-C18</b>           | 0.81                 | 0.84                  | 0.81                            | 0.73                            | 0.66                 | 0.81              | 0.88                  | 0.74                            | 0.78                             | 0.72                             | 0.72                            | 0.89                  | 0.72         | 0.70                 |
| <b>O3-AA-C19</b>           | 0.72                 | 0.73                  | 0.72                            | 0.66                            | 0.56                 | 0.73              | 0.84                  | 0.64                            | 0.69                             | 0.64                             | 0.63                            | 0.87                  | 0.64         | 0.62                 |
| <b>GS-O3-C19</b>           | 0.86                 | 0.86                  | 0.85                            | 0.79                            | 0.73                 | 0.86              | 0.87                  | 0.80                            | 0.84                             | 0.79                             | 0.77                            | 0.84                  | 0.79         | 0.76                 |
| <b>HD</b>                  | -0.04                | -0.03                 | 0.06                            | 0.03                            | 0.15                 | 0.00              | -0.13                 | -0.06                           | 0.06                             | 0.04                             | 0.03                            | -0.03                 | 0.00         | 0.11                 |
| <b>C19-AA</b>              | 0.74                 | 0.79                  | 0.71                            | 0.64                            | 0.67                 | 0.71              | 0.67                  | 0.67                            | 0.71                             | 0.66                             | 0.65                            | 0.66                  | 0.63         | 0.65                 |
| <b>SASA<sub>side</sub></b> | 0.02                 | -0.01                 | -0.04                           | -0.02                           | 0.13                 | 0.08              | 0.04                  | 0.18                            | 0.00                             | 0.04                             | 0.19                            | 0.06                  | 0.09         | 0.08                 |
| <b>MR</b>                  | 0.04                 | 0.00                  | 0.05                            | 0.06                            | 0.05                 | 0.08              | 0.01                  | 0.14                            | 0.05                             | 0.06                             | 0.11                            | -0.07                 | 0.14         | 0.09                 |
| <b>KierFlex</b>            | -0.05                | -0.07                 | -0.01                           | -0.01                           | -0.01                | 0.01              | -0.06                 | 0.07                            | -0.02                            | 0.01                             | 0.05                            | -0.11                 | 0.06         | 0.03                 |
| <b>O3-AA-BC</b>            | 0.75                 | 0.76                  | 0.75                            | 0.69                            | 0.60                 | 0.76              | 0.83                  | 0.69                            | 0.72                             | 0.68                             | 0.67                            | 0.85                  | 0.67         | 0.64                 |
| <b>GS-O3-AA</b>            | 0.45                 | 0.31                  | 0.47                            | 0.51                            | 0.44                 | 0.55              | 0.42                  | 0.62                            | 0.50                             | 0.54                             | 0.59                            | 0.37                  | 0.59         | 0.49                 |
| <b>brotN</b>               | -0.11                | -0.15                 | -0.07                           | -0.07                           | -0.08                | -0.07             | -0.15                 | -0.01                           | -0.09                            | -0.08                            | -0.03                           | -0.20                 | -0.02        | -0.02                |
| <b>MW</b>                  | -0.06                | -0.09                 | -0.03                           | -0.01                           | -0.03                | -0.02             | -0.11                 | 0.02                            | -0.04                            | -0.01                            | 0.01                            | -0.19                 | 0.04         | 0.03                 |
| <b>C18-AA</b>              | 0.70                 | 0.73                  | 0.67                            | 0.63                            | 0.69                 | 0.66              | 0.53                  | 0.64                            | 0.69                             | 0.67                             | 0.62                            | 0.43                  | 0.63         | 0.66                 |

Table S3. Contd.

|                             | O7-AA-BC | BC-GS <sub>max</sub> | PSA   | C19-GS | O7-AA-C18 | GS-O3-C18 | O3-C19-GS | C18-GS | C19-GS <sub>max</sub> | SASA  | O3-AA | BC-AA | C18-GS <sub>max</sub> | GS-O7-C19 |
|-----------------------------|----------|----------------------|-------|--------|-----------|-----------|-----------|--------|-----------------------|-------|-------|-------|-----------------------|-----------|
| <b>O7-AA-BC</b>             | 1.00     |                      |       |        |           |           |           |        |                       |       |       |       |                       |           |
| <b>BC-GS<sub>max</sub></b>  | 0.60     | 1.00                 |       |        |           |           |           |        |                       |       |       |       |                       |           |
| <b>PSA</b>                  | 0.11     | 0.28                 | 1.00  |        |           |           |           |        |                       |       |       |       |                       |           |
| <b>C19-GS</b>               | 0.68     | 0.97                 | 0.32  | 1.00   |           |           |           |        |                       |       |       |       |                       |           |
| <b>O7-AA-C18</b>            | 0.95     | 0.69                 | 0.17  | 0.77   | 1.00      |           |           |        |                       |       |       |       |                       |           |
| <b>GS-O3-C18</b>            | 0.78     | 0.76                 | 0.23  | 0.81   | 0.78      | 1.00      |           |        |                       |       |       |       |                       |           |
| <b>O3-C19-GS</b>            | 0.82     | 0.60                 | 0.17  | 0.66   | 0.75      | 0.91      | 1.00      |        |                       |       |       |       |                       |           |
| <b>C18-GS</b>               | 0.62     | 0.98                 | 0.34  | 0.99   | 0.70      | 0.77      | 0.60      | 1.00   |                       |       |       |       |                       |           |
| <b>C19-GS<sub>max</sub></b> | 0.57     | 0.98                 | 0.27  | 0.96   | 0.66      | 0.70      | 0.53      | 0.97   | 1.00                  |       |       |       |                       |           |
| <b>SASA</b>                 | 0.46     | 0.62                 | -0.12 | 0.58   | 0.48      | 0.57      | 0.35      | 0.57   | 0.60                  | 1.00  |       |       |                       |           |
| <b>O3-AA</b>                | 0.88     | 0.51                 | 0.19  | 0.60   | 0.78      | 0.86      | 0.87      | 0.54   | 0.47                  | 0.49  | 1.00  |       |                       |           |
| <b>BC-AA</b>                | 0.90     | 0.62                 | 0.16  | 0.71   | 0.90      | 0.78      | 0.75      | 0.63   | 0.61                  | 0.52  | 0.87  | 1.00  |                       |           |
| <b>C18-GS<sub>max</sub></b> | 0.53     | 0.97                 | 0.31  | 0.94   | 0.62      | 0.67      | 0.50      | 0.97   | 0.99                  | 0.58  | 0.43  | 0.54  | 1.00                  |           |
| <b>GS-O7-C19</b>            | 0.63     | 0.78                 | 0.22  | 0.82   | 0.78      | 0.72      | 0.62      | 0.77   | 0.74                  | 0.44  | 0.53  | 0.69  | 0.69                  | 1.00      |
| <b>C19-GS-O7</b>            | 0.50     | 0.93                 | 0.34  | 0.93   | 0.58      | 0.68      | 0.47      | 0.96   | 0.94                  | 0.60  | 0.44  | 0.53  | 0.95                  | 0.67      |
| <b>GS-O7-AA</b>             | 0.31     | 0.60                 | 0.19  | 0.58   | 0.28      | 0.45      | 0.34      | 0.63   | 0.63                  | 0.44  | 0.41  | 0.33  | 0.67                  | 0.32      |
| <b>O7-AA-C19</b>            | 0.68     | 0.58                 | 0.33  | 0.65   | 0.76      | 0.59      | 0.55      | 0.60   | 0.58                  | 0.36  | 0.59  | 0.82  | 0.54                  | 0.70      |
| <b>O3-AA-C18</b>            | 0.89     | 0.66                 | 0.27  | 0.74   | 0.89      | 0.88      | 0.86      | 0.68   | 0.60                  | 0.49  | 0.90  | 0.89  | 0.57                  | 0.75      |
| <b>O3-AA-C19</b>            | 0.85     | 0.56                 | 0.17  | 0.66   | 0.81      | 0.85      | 0.81      | 0.61   | 0.52                  | 0.46  | 0.89  | 0.80  | 0.50                  | 0.61      |
| <b>GS-O3-C19</b>            | 0.78     | 0.74                 | 0.29  | 0.81   | 0.81      | 0.91      | 0.89      | 0.76   | 0.70                  | 0.50  | 0.80  | 0.82  | 0.66                  | 0.81      |
| <b>HD</b>                   | 0.03     | -0.04                | 0.23  | 0.01   | 0.05      | -0.05     | -0.13     | 0.02   | -0.06                 | 0.18  | -0.04 | -0.04 | 0.00                  | -0.12     |
| <b>C19-AA</b>               | 0.81     | 0.62                 | 0.20  | 0.69   | 0.88      | 0.65      | 0.63      | 0.61   | 0.61                  | 0.45  | 0.68  | 0.93  | 0.54                  | 0.74      |
| <b>SASA<sub>side</sub></b>  | 0.02     | 0.18                 | -0.33 | 0.09   | -0.01     | 0.07      | -0.12     | 0.12   | 0.19                  | 0.81  | 0.05  | 0.06  | 0.19                  | -0.03     |
| <b>MR</b>                   | -0.02    | 0.19                 | -0.16 | 0.10   | -0.03     | 0.06      | 0.07      | 0.12   | 0.18                  | 0.05  | -0.09 | 0.00  | 0.18                  | 0.01      |
| <b>KierFlex</b>             | -0.04    | 0.11                 | -0.21 | 0.03   | -0.08     | 0.02      | 0.05      | 0.05   | 0.10                  | 0.02  | -0.13 | -0.07 | 0.11                  | -0.10     |
| <b>O3AABC</b>               | 0.82     | 0.61                 | 0.27  | 0.69   | 0.80      | 0.84      | 0.82      | 0.64   | 0.56                  | 0.48  | 0.89  | 0.86  | 0.53                  | 0.67      |
| <b>GSO3AA</b>               | 0.30     | 0.61                 | 0.17  | 0.57   | 0.26      | 0.49      | 0.35      | 0.62   | 0.64                  | 0.58  | 0.43  | 0.36  | 0.67                  | 0.27      |
| <b>brotN</b>                | -0.18    | 0.04                 | -0.20 | -0.05  | -0.22     | -0.06     | -0.02     | -0.03  | 0.04                  | -0.08 | -0.23 | -0.17 | 0.05                  | -0.21     |
| <b>MW</b>                   | -0.18    | 0.07                 | -0.13 | 0.00   | -0.18     | -0.04     | -0.03     | 0.02   | 0.06                  | -0.08 | -0.23 | -0.16 | 0.07                  | -0.08     |
| <b>C18-AA</b>               | 0.60     | 0.62                 | 0.25  | 0.68   | 0.76      | 0.51      | 0.47      | 0.62   | 0.61                  | 0.33  | 0.43  | 0.74  | 0.56                  | 0.82      |

**Table S3. Contd.**

|                            | <b>C19-<br/>GS-<br/>O7</b> | <b>GS-<br/>O7-<br/>AA</b> | <b>O7-<br/>AA-<br/>C19</b> | <b>O3-<br/>AA-<br/>C18</b> | <b>O3-<br/>AA-<br/>C19</b> | <b>GS-O3-<br/>C19</b> | <b>HD</b> | <b>C19-<br/>AA</b> | <b>SASA<sub>side</sub></b> | <b>MR</b> | <b>KierFlex</b> | <b>O3-<br/>AA-<br/>BC</b> | <b>GS-<br/>O3-<br/>AA</b> | <b>brotn</b> | <b>MW</b> | <b>C18-<br/>AA</b> |
|----------------------------|----------------------------|---------------------------|----------------------------|----------------------------|----------------------------|-----------------------|-----------|--------------------|----------------------------|-----------|-----------------|---------------------------|---------------------------|--------------|-----------|--------------------|
| <b>C19-GS-O7</b>           | 1.00                       |                           |                            |                            |                            |                       |           |                    |                            |           |                 |                           |                           |              |           |                    |
| <b>GS-O7-AA</b>            | 0.66                       | 1.00                      |                            |                            |                            |                       |           |                    |                            |           |                 |                           |                           |              |           |                    |
| <b>O7-AA-C19</b>           | 0.56                       | 0.21                      | 1.00                       |                            |                            |                       |           |                    |                            |           |                 |                           |                           |              |           |                    |
| <b>O3-AA-C18</b>           | 0.59                       | 0.37                      | 0.81                       | 1.00                       |                            |                       |           |                    |                            |           |                 |                           |                           |              |           |                    |
| <b>O3-AA-C19</b>           | 0.55                       | 0.39                      | 0.67                       | 0.93                       | 1.00                       |                       |           |                    |                            |           |                 |                           |                           |              |           |                    |
| <b>GS-O3-C19</b>           | 0.69                       | 0.38                      | 0.76                       | 0.90                       | 0.80                       | 1.00                  |           |                    |                            |           |                 |                           |                           |              |           |                    |
| <b>HD</b>                  | 0.11                       | -0.10                     | 0.03                       | 0.00                       | 0.07                       | -0.04                 | 1.00      |                    |                            |           |                 |                           |                           |              |           |                    |
| <b>C19-AA</b>              | 0.53                       | 0.19                      | 0.93                       | 0.84                       | 0.67                       | 0.79                  | 0.00      | 1.00               |                            |           |                 |                           |                           |              |           |                    |
| <b>SASA<sub>side</sub></b> | 0.22                       | 0.26                      | -0.06                      | -0.01                      | 0.01                       | 0.01                  | 0.18      | 0.00               | 1.00                       |           |                 |                           |                           |              |           |                    |
| <b>MR</b>                  | 0.09                       | 0.10                      | -0.05                      | -0.04                      | -0.10                      | 0.09                  | -0.14     | -0.01              | 0.14                       | 1.00      |                 |                           |                           |              |           |                    |
| <b>KierFlex</b>            | 0.01                       | 0.02                      | -0.10                      | -0.08                      | -0.14                      | 0.01                  | -0.14     | -0.08              | 0.12                       | 0.93      | 1.00            |                           |                           |              |           |                    |
| <b>O3-AA-BC</b>            | 0.58                       | 0.42                      | 0.80                       | 0.98                       | 0.93                       | 0.87                  | -0.02     | 0.78               | 0.00                       | -0.06     | -0.09           | 1.00                      |                           |              |           |                    |
| <b>GS-O3-AA</b>            | 0.69                       | 0.91                      | 0.32                       | 0.44                       | 0.45                       | 0.44                  | -0.04     | 0.26               | 0.41                       | 0.13      | 0.08            | 0.51                      | 1.00                      |              |           |                    |
| <b>brotn</b>               | -0.04                      | -0.05                     | -0.17                      | -0.20                      | -0.25                      | -0.05                 | -0.15     | -0.16              | 0.04                       | 0.90      | 0.94            | -0.20                     | 0.04                      | 1.00         |           |                    |
| <b>MW</b>                  | 0.00                       | -0.02                     | -0.13                      | -0.14                      | -0.20                      | -0.02                 | -0.16     | -0.14              | 0.01                       | 0.93      | 0.94            | -0.14                     | 0.03                      | 0.93         | 1.00      |                    |
| <b>C18-AA</b>              | 0.55                       | 0.12                      | 0.92                       | 0.70                       | 0.52                       | 0.72                  | 0.00      | 0.91               | -0.10                      | 0.02      | -0.06           | 0.65                      | 0.17                      | -0.14        | -         | 1.00               |
|                            |                            |                           |                            |                            |                            |                       |           |                    |                            |           |                 |                           |                           |              | 0.05      |                    |

**Table S4.** Values of structural and physico-chemical descriptors for the aniliny conjugate of glu-CDCA in quantitative CSP-SAR analysis. Conjugates are listed in the decreasing order of  $K_i$  potency.<sup>a</sup>

| Compound | $K_i$<br>( $\mu\text{M}$ ) | $\Delta G_w$<br>(kcal/mol) | $\log P_c$ | C18-<br>GS-O7 | C19-<br>GS-O3 | O7-<br>C18-GS | O7-<br>AA | O7-AA-<br>C20 | O7-<br>AA-GS | HA | O3-<br>C18-GS | O7-C19-<br>GS | O7-<br>GS <sub>min</sub> | PSA <sub>side</sub><br>( $\text{\AA}^2$ ) | O7-<br>GS |
|----------|----------------------------|----------------------------|------------|---------------|---------------|---------------|-----------|---------------|--------------|----|---------------|---------------|--------------------------|-------------------------------------------|-----------|
| 14       | 0.587                      | -78.2                      | 2.59       | 0.761         | 0.850         | 0.877         | 0.912     | 0.908         | 0.772        | 6  | 0.854         | 0.837         | 0.728                    | 168                                       | 0.751     |
| 8        | 0.890                      | -78.1                      | 1.65       | 0.857         | 0.825         | 0.747         | 0.779     | 0.771         | 0.747        | 6  | 0.852         | 0.742         | 0.732                    | 162                                       | 0.675     |
| 19       | 1.15                       | -76.9                      | 1.71       | 0.730         | 0.908         | 0.885         | 0.905     | 0.908         | 0.809        | 8  | 0.846         | 0.864         | 0.701                    | 181                                       | 0.688     |
| 5        | 1.25                       | -75.2                      | 1.45       | 0.909         | 0.869         | 0.834         | 0.930     | 0.916         | 0.868        | 6  | 0.877         | 0.853         | 0.880                    | 251                                       | 0.835     |
| 2        | 1.91                       | -73.8                      | 2.04       | 0.843         | 0.808         | 0.849         | 0.845     | 0.831         | 0.788        | 6  | 0.847         | 0.820         | 0.794                    | 225                                       | 0.782     |
| 1        | 2.00                       | -79.3                      | 1.10       | 0.767         | 0.870         | 0.858         | 0.856     | 0.891         | 0.819        | 6  | 0.881         | 0.856         | 0.808                    | 173                                       | 0.762     |
| 3        | 2.02                       | -69.5                      | 2.57       | 0.926         | 0.788         | 0.760         | 0.808     | 0.802         | 0.774        | 6  | 0.770         | 0.753         | 0.755                    | 236                                       | 0.745     |
| 30       | 2.24                       | -88.1                      | 2.25       | 0.781         | 0.745         | 0.872         | 0.847     | 0.836         | 0.801        | 8  | 0.871         | 0.789         | 0.794                    | 187                                       | 0.796     |
| 16       | 2.31                       | -78.6                      | 1.15       | 0.653         | 0.754         | 0.875         | 0.892     | 0.887         | 0.686        | 6  | 0.820         | 0.805         | 0.676                    | 207                                       | 0.644     |
| 4        | 2.31                       | -75.6                      | 1.30       | 0.672         | 0.783         | 0.843         | 0.923     | 0.944         | 0.767        | 8  | 0.893         | 0.843         | 0.703                    | 184                                       | 0.661     |
| 7        | 2.63                       | -79.4                      | 1.58       | 0.666         | 0.815         | 0.838         | 0.908     | 0.900         | 0.652        | 6  | 0.850         | 0.789         | 0.637                    | 167                                       | 0.603     |
| 23       | 2.64                       | -75.4                      | 0.748      | 0.806         | 0.859         | 0.814         | 0.894     | 0.896         | 0.756        | 7  | 0.801         | 0.859         | 0.796                    | 192                                       | 0.747     |
| 6        | 3.02                       | -70.4                      | 2.07       | 0.791         | 0.566         | 0.542         | 0.601     | 0.604         | 0.570        | 6  | 0.538         | 0.647         | 0.549                    | 199                                       | 0.545     |
| 26       | 3.16                       | -74.2                      | 1.60       | 0.750         | 0.851         | 0.881         | 0.873     | 0.883         | 0.794        | 6  | 0.857         | 0.843         | 0.757                    | 245                                       | 0.735     |
| 9        | 3.20                       | -79.8                      | 1.43       | 0.882         | 0.873         | 0.878         | 0.930     | 0.931         | 0.870        | 6  | 0.880         | 0.844         | 0.887                    | 173                                       | 0.856     |
| 10       | 3.89                       | -80.6                      | 0.303      | 0.669         | 0.762         | 0.889         | 0.892     | 0.895         | 0.723        | 7  | 0.835         | 0.832         | 0.698                    | 177                                       | 0.675     |
| 13       | 3.93                       | -76.7                      | 2.78       | 0.594         | 0.799         | 0.850         | 0.900     | 0.910         | 0.602        | 6  | 0.860         | 0.850         | 0.510                    | 164                                       | 0.550     |
| 18       | 4.03                       | -75.6                      | 1.22       | 0.893         | 0.894         | 0.882         | 0.926     | 0.934         | 0.852        | 8  | 0.883         | 0.870         | 0.817                    | 191                                       | 0.832     |
| 11       | 4.22                       | -80.6                      | 0.248      | 0.907         | 0.907         | 0.897         | 0.928     | 0.937         | 0.883        | 7  | 0.903         | 0.905         | 0.885                    | 186                                       | 0.875     |
| 28       | 4.30                       | -75.7                      | 2.12       | 0.468         | 0.612         | 0.809         | 0.804     | 0.863         | 0.494        | 6  | 0.624         | 0.636         | 0.451                    | 153                                       | 0.468     |
| 20       | 5.16                       | -74.0                      | 1.99       | 0.847         | 0.828         | 0.889         | 0.926     | 0.936         | 0.777        | 8  | 0.906         | 0.867         | 0.790                    | 185                                       | 0.795     |
| 29       | 5.19                       | -77.0                      | -0.0331    | 0.874         | 0.790         | 0.752         | 0.777     | 0.786         | 0.750        | 6  | 0.775         | 0.773         | 0.712                    | 173                                       | 0.688     |
| 22       | 5.26                       | -73.4                      | 1.72       | 0.812         | 0.453         | 0.449         | 0.711     | 0.704         | 0.449        | 7  | 0.444         | 0.463         | 0.451                    | 188                                       | 0.433     |
| 12       | 6.09                       | -79.6                      | 0.441      | 0.922         | 0.927         | 0.883         | 0.886     | 0.884         | 0.880        | 7  | 0.903         | 0.885         | 0.861                    | 186                                       | 0.845     |
| 21       | 6.53                       | -79.6                      | 1.09       | 0.894         | 0.856         | 0.915         | 0.923     | 0.923         | 0.850        | 7  | 0.886         | 0.869         | 0.799                    | 187                                       | 0.868     |
| 17       | 7.65                       | -77.8                      | 1.06       | 0.904         | 0.934         | 0.903         | 0.921     | 0.935         | 0.852        | 8  | 0.892         | 0.906         | 0.865                    | 198                                       | 0.848     |
| 27       | 8.07                       | -79.1                      | 2.04       | 0.748         | 0.876         | 0.894         | 0.933     | 0.941         | 0.795        | 6  | 0.892         | 0.857         | 0.707                    | 164                                       | 0.714     |
| 25       | 15.9                       | -82.5                      | 0.067      | 0.697         | 0.848         | 0.800         | 0.859     | 0.894         | 0.752        | 7  | 0.851         | 0.811         | 0.782                    | 239                                       | 0.737     |
| 24       | 16.3                       | -84.1                      | -0.061     | 0.812         | 0.823         | 0.805         | 0.888     | 0.894         | 0.786        | 7  | 0.865         | 0.769         | 0.815                    | 245                                       | 0.791     |
| 32       | 35.9                       | -165                       | -5.41      | 0.308         | 0.291         | 0.286         | 0.642     | 0.638         | 0.285        | 8  | 0.329         | 0.359         | 0.285                    | 215                                       | 0.284     |
| 31       | 40.4                       | -179                       | -6.40      | 0.617         | 0.655         | 0.747         | 0.705     | 0.713         | 0.667        | 8  | 0.768         | 0.807         | 0.619                    | 235                                       | 0.614     |

Table S4. Contd.

| Compound | K <sub>i</sub><br>( $\mu$ M) | O3-<br>AA-<br>GS | C18-<br>GS-<br>O3 | O3-<br>GS <sub>min</sub> | BC-<br>GS <sub>min</sub> | AA-<br>GS-<br>O3 | O3-<br>GS | GS-<br>O7-<br>C18 | O3-<br>GS <sub>max</sub> | C19-<br>GS <sub>min</sub> | C18-<br>GS <sub>min</sub> | O7-<br>GS <sub>max</sub> | O3-<br>AA-<br>C20 | BC-<br>GS | AA-<br>GS-<br>O7 | O7-<br>AA-<br>BC |
|----------|------------------------------|------------------|-------------------|--------------------------|--------------------------|------------------|-----------|-------------------|--------------------------|---------------------------|---------------------------|--------------------------|-------------------|-----------|------------------|------------------|
| 14       | 0.587                        | 0.769            | 0.785             | 0.731                    | 0.754                    | 0.757            | 0.759     | 0.862             | 0.727                    | 0.763                     | 0.773                     | 0.732                    | 0.941             | 0.753     | 0.745            | 0.903            |
| 8        | 0.890                        | 0.718            | 0.802             | 0.721                    | 0.620                    | 0.670            | 0.670     | 0.725             | 0.597                    | 0.623                     | 0.611                     | 0.592                    | 0.813             | 0.592     | 0.702            | 0.781            |
| 19       | 1.15                         | 0.768            | 0.901             | 0.687                    | 0.627                    | 0.721            | 0.692     | 0.843             | 0.667                    | 0.650                     | 0.637                     | 0.672                    | 0.934             | 0.622     | 0.699            | 0.914            |
| 5        | 1.25                         | 0.851            | 0.924             | 0.842                    | 0.841                    | 0.848            | 0.815     | 0.835             | 0.739                    | 0.805                     | 0.842                     | 0.755                    | 0.924             | 0.782     | 0.835            | 0.945            |
| 2        | 1.91                         | 0.846            | 0.859             | 0.817                    | 0.877                    | 0.868            | 0.792     | 0.848             | 0.779                    | 0.821                     | 0.828                     | 0.807                    | 0.810             | 0.832     | 0.825            | 0.882            |
| 1        | 2.00                         | 0.799            | 0.907             | 0.817                    | 0.794                    | 0.807            | 0.745     | 0.878             | 0.639                    | 0.802                     | 0.805                     | 0.660                    | 0.910             | 0.707     | 0.781            | 0.882            |
| 3        | 2.02                         | 0.801            | 0.792             | 0.755                    | 0.801                    | 0.799            | 0.751     | 0.763             | 0.738                    | 0.761                     | 0.773                     | 0.744                    | 0.792             | 0.810     | 0.839            | 0.803            |
| 30       | 2.24                         | 0.799            | 0.815             | 0.747                    | 0.753                    | 0.787            | 0.773     | 0.862             | 0.733                    | 0.699                     | 0.743                     | 0.751                    | 0.915             | 0.742     | 0.766            | 0.734            |
| 16       | 2.31                         | 0.687            | 0.704             | 0.679                    | 0.663                    | 0.640            | 0.656     | 0.822             | 0.569                    | 0.672                     | 0.670                     | 0.550                    | 0.932             | 0.625     | 0.598            | 0.848            |
| 4        | 2.31                         | 0.780            | 0.859             | 0.711                    | 0.680                    | 0.723            | 0.675     | 0.838             | 0.603                    | 0.696                     | 0.698                     | 0.603                    | 0.947             | 0.645     | 0.652            | 0.947            |
| 7        | 2.63                         | 0.649            | 0.762             | 0.636                    | 0.577                    | 0.590            | 0.611     | 0.797             | 0.521                    | 0.580                     | 0.550                     | 0.505                    | 0.881             | 0.544     | 0.566            | 0.901            |
| 23       | 2.64                         | 0.787            | 0.829             | 0.814                    | 0.770                    | 0.848            | 0.732     | 0.834             | 0.648                    | 0.766                     | 0.742                     | 0.690                    | 0.921             | 0.673     | 0.833            | 0.920            |
| 6        | 3.02                         | 0.560            | 0.576             | 0.534                    | 0.588                    | 0.636            | 0.529     | 0.557             | 0.513                    | 0.555                     | 0.607                     | 0.528                    | 0.553             | 0.581     | 0.579            | 0.573            |
| 26       | 3.16                         | 0.760            | 0.793             | 0.755                    | 0.722                    | 0.736            | 0.725     | 0.856             | 0.665                    | 0.736                     | 0.721                     | 0.658                    | 0.926             | 0.701     | 0.726            | 0.883            |
| 9        | 3.20                         | 0.866            | 0.882             | 0.866                    | 0.881                    | 0.885            | 0.818     | 0.872             | 0.774                    | 0.871                     | 0.862                     | 0.829                    | 0.945             | 0.847     | 0.893            | 0.960            |
| 10       | 3.89                         | 0.724            | 0.730             | 0.704                    | 0.706                    | 0.668            | 0.692     | 0.842             | 0.628                    | 0.706                     | 0.712                     | 0.613                    | 0.924             | 0.662     | 0.621            | 0.873            |
| 13       | 3.93                         | 0.602            | 0.749             | 0.528                    | 0.509                    | 0.541            | 0.573     | 0.819             | 0.551                    | 0.537                     | 0.528                     | 0.533                    | 0.887             | 0.539     | 0.522            | 0.946            |
| 18       | 4.03                         | 0.863            | 0.897             | 0.826                    | 0.806                    | 0.868            | 0.852     | 0.888             | 0.861                    | 0.826                     | 0.836                     | 0.862                    | 0.925             | 0.840     | 0.853            | 0.974            |
| 11       | 4.22                         | 0.895            | 0.928             | 0.881                    | 0.892                    | 0.913            | 0.848     | 0.916             | 0.784                    | 0.869                     | 0.885                     | 0.815                    | 0.947             | 0.843     | 0.873            | 0.963            |
| 28       | 4.30                         | 0.444            | 0.433             | 0.439                    | 0.428                    | 0.417            | 0.435     | 0.675             | 0.432                    | 0.427                     | 0.429                     | 0.441                    | 0.799             | 0.435     | 0.453            | 0.770            |
| 20       | 5.16                         | 0.792            | 0.908             | 0.837                    | 0.827                    | 0.812            | 0.806     | 0.898             | 0.770                    | 0.815                     | 0.819                     | 0.767                    | 0.924             | 0.808     | 0.788            | 0.976            |
| 29       | 5.19                         | 0.730            | 0.781             | 0.711                    | 0.698                    | 0.825            | 0.698     | 0.740             | 0.667                    | 0.699                     | 0.710                     | 0.667                    | 0.787             | 0.688     | 0.721            | 0.784            |
| 22       | 5.26                         | 0.467            | 0.455             | 0.451                    | 0.460                    | 0.647            | 0.421     | 0.468             | 0.407                    | 0.533                     | 0.562                     | 0.409                    | 0.625             | 0.422     | 0.551            | 0.715            |
| 12       | 6.09                         | 0.884            | 0.909             | 0.891                    | 0.885                    | 0.883            | 0.874     | 0.896             | 0.835                    | 0.854                     | 0.887                     | 0.839                    | 0.896             | 0.865     | 0.893            | 0.936            |
| 21       | 6.53                         | 0.835            | 0.881             | 0.805                    | 0.779                    | 0.865            | 0.839     | 0.898             | 0.793                    | 0.775                     | 0.772                     | 0.859                    | 0.935             | 0.832     | 0.844            | 0.946            |
| 17       | 7.65                         | 0.859            | 0.920             | 0.870                    | 0.868                    | 0.882            | 0.837     | 0.915             | 0.806                    | 0.846                     | 0.859                     | 0.814                    | 0.947             | 0.825     | 0.903            | 0.964            |
| 27       | 8.07                         | 0.799            | 0.854             | 0.727                    | 0.701                    | 0.751            | 0.735     | 0.841             | 0.639                    | 0.719                     | 0.703                     | 0.632                    | 0.931             | 0.691     | 0.711            | 0.935            |
| 25       | 15.9                         | 0.770            | 0.860             | 0.828                    | 0.798                    | 0.745            | 0.781     | 0.828             | 0.703                    | 0.760                     | 0.765                     | 0.672                    | 0.906             | 0.734     | 0.736            | 0.879            |
| 24       | 16.3                         | 0.779            | 0.848             | 0.795                    | 0.796                    | 0.824            | 0.745     | 0.808             | 0.640                    | 0.796                     | 0.785                     | 0.733                    | 0.915             | 0.777     | 0.812            | 0.906            |
| 32       | 35.9                         | 0.335            | 0.304             | 0.291                    | 0.297                    | 0.371            | 0.301     | 0.422             | 0.314                    | 0.335                     | 0.371                     | 0.286                    | 0.587             | 0.311     | 0.296            | 0.650            |
| 31       | 40.4                         | 0.672            | 0.722             | 0.632                    | 0.601                    | 0.648            | 0.640     | 0.794             | 0.583                    | 0.628                     | 0.613                     | 0.585                    | 0.813             | 0.606     | 0.679            | 0.763            |



Table S4. Contd.

| Compound | K <sub>i</sub><br>( $\mu$ M) | BC-<br>GS <sub>max</sub> | PSA<br>( $\text{\AA}^2$ ) | C19-<br>GS | O7-<br>AA-<br>C18 | GS-<br>O3-<br>C18 | O3-<br>C19-<br>GS | C18-<br>GS | C19-<br>GS <sub>max</sub> | SASA<br>( $\text{\AA}^2$ ) | O3-<br>AA | BC-<br>AA | C18-<br>GS <sub>max</sub> | GS-<br>O7-<br>C19 | C19-<br>GS-<br>O7 | GS-<br>O7-<br>AA |
|----------|------------------------------|--------------------------|---------------------------|------------|-------------------|-------------------|-------------------|------------|---------------------------|----------------------------|-----------|-----------|---------------------------|-------------------|-------------------|------------------|
| 14       | 0.587                        | 0.733                    | 247                       | 0.765      | 0.859             | 0.885             | 0.888             | 0.764      | 0.744                     | 1033                       | 0.932     | 0.918     | 0.719                     | 0.809             | 0.844             | 0.856            |
| 8        | 0.890                        | 0.548                    | 240                       | 0.597      | 0.745             | 0.822             | 0.835             | 0.551      | 0.546                     | 960                        | 0.828     | 0.871     | 0.488                     | 0.702             | 0.606             | 0.626            |
| 19       | 1.15                         | 0.614                    | 256                       | 0.637      | 0.892             | 0.790             | 0.854             | 0.589      | 0.583                     | 1006                       | 0.853     | 0.882     | 0.537                     | 0.824             | 0.646             | 0.607            |
| 5        | 1.25                         | 0.717                    | 328                       | 0.762      | 0.927             | 0.869             | 0.849             | 0.769      | 0.684                     | 953                        | 0.920     | 0.921     | 0.655                     | 0.823             | 0.776             | 0.709            |
| 2        | 1.91                         | 0.834                    | 299                       | 0.823      | 0.837             | 0.845             | 0.788             | 0.855      | 0.846                     | 965                        | 0.832     | 0.872     | 0.837                     | 0.805             | 0.918             | 0.753            |
| 1        | 2.00                         | 0.629                    | 251                       | 0.719      | 0.860             | 0.895             | 0.874             | 0.712      | 0.617                     | 956                        | 0.881     | 0.853     | 0.571                     | 0.843             | 0.805             | 0.718            |
| 3        | 2.02                         | 0.784                    | 303                       | 0.774      | 0.797             | 0.780             | 0.762             | 0.796      | 0.764                     | 966                        | 0.785     | 0.786     | 0.781                     | 0.791             | 0.861             | 0.796            |
| 30       | 2.24                         | 0.708                    | 264                       | 0.713      | 0.692             | 0.890             | 0.737             | 0.709      | 0.685                     | 1122                       | 0.893     | 0.794     | 0.656                     | 0.773             | 0.826             | 0.857            |
| 16       | 2.31                         | 0.546                    | 285                       | 0.642      | 0.785             | 0.843             | 0.875             | 0.622      | 0.565                     | 918                        | 0.915     | 0.860     | 0.512                     | 0.754             | 0.685             | 0.761            |
| 4        | 2.31                         | 0.604                    | 262                       | 0.668      | 0.928             | 0.863             | 0.898             | 0.629      | 0.582                     | 986                        | 0.925     | 0.910     | 0.539                     | 0.857             | 0.741             | 0.614            |
| 7        | 2.63                         | 0.481                    | 245                       | 0.562      | 0.875             | 0.783             | 0.738             | 0.514      | 0.498                     | 942                        | 0.886     | 0.878     | 0.447                     | 0.725             | 0.586             | 0.725            |
| 23       | 2.64                         | 0.610                    | 270                       | 0.676      | 0.878             | 0.825             | 0.836             | 0.629      | 0.568                     | 971                        | 0.918     | 0.884     | 0.517                     | 0.823             | 0.687             | 0.610            |
| 6        | 3.02                         | 0.549                    | 255                       | 0.577      | 0.619             | 0.577             | 0.545             | 0.581      | 0.556                     | 877                        | 0.539     | 0.552     | 0.543                     | 0.792             | 0.650             | 0.698            |
| 26       | 3.16                         | 0.644                    | 322                       | 0.702      | 0.842             | 0.868             | 0.896             | 0.683      | 0.647                     | 941                        | 0.940     | 0.877     | 0.621                     | 0.809             | 0.743             | 0.846            |
| 9        | 3.20                         | 0.814                    | 251                       | 0.839      | 0.944             | 0.886             | 0.869             | 0.855      | 0.805                     | 993                        | 0.927     | 0.934     | 0.821                     | 0.841             | 0.916             | 0.825            |
| 10       | 3.89                         | 0.618                    | 255                       | 0.679      | 0.818             | 0.872             | 0.888             | 0.665      | 0.615                     | 959                        | 0.926     | 0.860     | 0.562                     | 0.787             | 0.739             | 0.776            |
| 13       | 3.93                         | 0.530                    | 241                       | 0.566      | 0.889             | 0.776             | 0.777             | 0.532      | 0.548                     | 977                        | 0.892     | 0.903     | 0.491                     | 0.791             | 0.583             | 0.673            |
| 18       | 4.03                         | 0.839                    | 269                       | 0.839      | 0.953             | 0.887             | 0.875             | 0.849      | 0.831                     | 1035                       | 0.919     | 0.924     | 0.849                     | 0.853             | 0.887             | 0.893            |
| 11       | 4.22                         | 0.782                    | 264                       | 0.830      | 0.948             | 0.928             | 0.882             | 0.833      | 0.755                     | 1005                       | 0.922     | 0.936     | 0.748                     | 0.876             | 0.865             | 0.817            |
| 28       | 4.30                         | 0.422                    | 232                       | 0.427      | 0.623             | 0.726             | 0.808             | 0.436      | 0.417                     | 906                        | 0.778     | 0.588     | 0.410                     | 0.524             | 0.551             | 0.699            |
| 20       | 5.16                         | 0.774                    | 263                       | 0.814      | 0.936             | 0.916             | 0.898             | 0.806      | 0.778                     | 1074                       | 0.933     | 0.921     | 0.746                     | 0.860             | 0.815             | 0.762            |
| 29       | 5.19                         | 0.699                    | 237                       | 0.687      | 0.782             | 0.787             | 0.755             | 0.671      | 0.681                     | 993                        | 0.726     | 0.789     | 0.638                     | 0.821             | 0.765             | 0.698            |
| 22       | 5.26                         | 0.414                    | 241                       | 0.493      | 0.699             | 0.564             | 0.490             | 0.484      | 0.487                     | 989                        | 0.654     | 0.685     | 0.439                     | 0.600             | 0.667             | 0.594            |
| 12       | 6.09                         | 0.835                    | 263                       | 0.848      | 0.909             | 0.913             | 0.884             | 0.837      | 0.826                     | 996                        | 0.898     | 0.942     | 0.814                     | 0.877             | 0.865             | 0.803            |
| 21       | 6.53                         | 0.806                    | 265                       | 0.799      | 0.912             | 0.928             | 0.875             | 0.836      | 0.751                     | 1111                       | 0.923     | 0.923     | 0.775                     | 0.840             | 0.898             | 0.869            |
| 17       | 7.65                         | 0.787                    | 276                       | 0.823      | 0.947             | 0.913             | 0.899             | 0.822      | 0.781                     | 1042                       | 0.932     | 0.928     | 0.780                     | 0.882             | 0.870             | 0.847            |
| 27       | 8.07                         | 0.621                    | 242                       | 0.732      | 0.875             | 0.820             | 0.865             | 0.695      | 0.659                     | 973                        | 0.911     | 0.886     | 0.591                     | 0.826             | 0.743             | 0.751            |
| 25       | 15.9                         | 0.673                    | 317                       | 0.715      | 0.869             | 0.873             | 0.866             | 0.714      | 0.654                     | 960                        | 0.869     | 0.826     | 0.666                     | 0.822             | 0.814             | 0.807            |
| 24       | 16.3                         | 0.692                    | 323                       | 0.791      | 0.873             | 0.874             | 0.833             | 0.793      | 0.704                     | 987                        | 0.894     | 0.874     | 0.723                     | 0.752             | 0.856             | 0.737            |
| 32       | 35.9                         | 0.318                    | 275                       | 0.375      | 0.574             | 0.495             | 0.533             | 0.358      | 0.385                     | 891                        | 0.693     | 0.711     | 0.341                     | 0.589             | 0.556             | 0.743            |
| 31       | 40.4                         | 0.575                    | 304                       | 0.613      | 0.771             | 0.833             | 0.791             | 0.600      | 0.578                     | 934                        | 0.799     | 0.771     | 0.533                     | 0.817             | 0.693             | 0.584            |

Table S4. Contd.

| Compound | K <sub>i</sub><br>( $\mu$ M) | O7-AA-<br>C19 | O3-AA-<br>C18 | O3-AA-<br>C19 | GS-O3-<br>C19 | HD | C19-AA | SASA <sub>side</sub><br>( $\text{\AA}^2$ ) | MR<br>( $\text{m}^3/\text{mol}$ ) | KierFlex | O3-AA-<br>BC | GS-O3-<br>AA | brotN | MW  | C18-<br>AA |
|----------|------------------------------|---------------|---------------|---------------|---------------|----|--------|--------------------------------------------|-----------------------------------|----------|--------------|--------------|-------|-----|------------|
| 14       | 0.587                        | 0.889         | 0.883         | 0.916         | 0.856         | 4  | 0.870  | 606                                        | 17.0                              | 8.79     | 0.902        | 0.864        | 12    | 610 | 0.872      |
| 8        | 0.890                        | 0.883         | 0.780         | 0.793         | 0.790         | 4  | 0.850  | 525                                        | 18.3                              | 9.87     | 0.804        | 0.651        | 15    | 669 | 0.878      |
| 19       | 1.15                         | 0.855         | 0.830         | 0.737         | 0.817         | 4  | 0.925  | 568                                        | 16.7                              | 8.71     | 0.801        | 0.569        | 12    | 614 | 0.894      |
| 5        | 1.25                         | 0.954         | 0.945         | 0.915         | 0.819         | 4  | 0.915  | 508                                        | 17.1                              | 9.39     | 0.951        | 0.686        | 12    | 630 | 0.917      |
| 2        | 1.91                         | 0.910         | 0.787         | 0.806         | 0.778         | 4  | 0.875  | 518                                        | 16.6                              | 8.55     | 0.796        | 0.712        | 12    | 596 | 0.864      |
| 1        | 2.00                         | 0.920         | 0.915         | 0.928         | 0.849         | 4  | 0.870  | 497                                        | 17.2                              | 9.28     | 0.946        | 0.721        | 13    | 664 | 0.907      |
| 3        | 2.02                         | 0.816         | 0.790         | 0.796         | 0.789         | 4  | 0.791  | 547                                        | 20.3                              | 10.4     | 0.795        | 0.784        | 16    | 730 | 0.851      |
| 30       | 2.24                         | 0.718         | 0.800         | 0.844         | 0.767         | 4  | 0.703  | 698                                        | 16.7                              | 8.71     | 0.858        | 0.919        | 12    | 614 | 0.699      |
| 16       | 2.31                         | 0.798         | 0.818         | 0.858         | 0.811         | 4  | 0.782  | 501                                        | 17.8                              | 9.61     | 0.848        | 0.690        | 14    | 654 | 0.781      |
| 4        | 2.31                         | 0.920         | 0.918         | 0.954         | 0.883         | 4  | 0.925  | 547                                        | 17.0                              | 8.79     | 0.939        | 0.574        | 12    | 610 | 0.923      |
| 7        | 2.63                         | 0.785         | 0.805         | 0.867         | 0.688         | 4  | 0.817  | 522                                        | 16.9                              | 8.79     | 0.795        | 0.628        | 12    | 611 | 0.774      |
| 23       | 2.64                         | 0.911         | 0.898         | 0.917         | 0.802         | 5  | 0.878  | 507                                        | 16.7                              | 8.71     | 0.914        | 0.601        | 12    | 614 | 0.894      |
| 6        | 3.02                         | 0.626         | 0.563         | 0.579         | 0.602         | 4  | 0.582  | 491                                        | 16.8                              | 8.87     | 0.570        | 0.545        | 12    | 632 | 0.779      |
| 26       | 3.16                         | 0.845         | 0.849         | 0.808         | 0.858         | 4  | 0.842  | 516                                        | 17.0                              | 8.79     | 0.858        | 0.781        | 12    | 610 | 0.847      |
| 9        | 3.20                         | 0.944         | 0.909         | 0.944         | 0.862         | 4  | 0.916  | 533                                        | 17.2                              | 9.27     | 0.931        | 0.817        | 13    | 626 | 0.930      |
| 10       | 3.89                         | 0.806         | 0.828         | 0.855         | 0.846         | 4  | 0.792  | 544                                        | 18.4                              | 9.50     | 0.846        | 0.708        | 13    | 652 | 0.796      |
| 13       | 3.93                         | 0.836         | 0.835         | 0.876         | 0.738         | 4  | 0.855  | 577                                        | 18.4                              | 9.66     | 0.833        | 0.615        | 13    | 650 | 0.853      |
| 18       | 4.03                         | 0.973         | 0.915         | 0.933         | 0.860         | 4  | 0.931  | 579                                        | 17.2                              | 9.27     | 0.923        | 0.918        | 13    | 626 | 0.935      |
| 11       | 4.22                         | 0.969         | 0.939         | 0.963         | 0.876         | 4  | 0.920  | 548                                        | 17.5                              | 9.03     | 0.955        | 0.815        | 12    | 624 | 0.935      |
| 28       | 4.30                         | 0.532         | 0.674         | 0.761         | 0.638         | 4  | 0.511  | 546                                        | 18.2                              | 10.1     | 0.704        | 0.688        | 15    | 668 | 0.514      |
| 20       | 5.16                         | 0.940         | 0.922         | 0.875         | 0.877         | 4  | 0.909  | 612                                        | 17.9                              | 10.0     | 0.920        | 0.758        | 14    | 656 | 0.918      |
| 29       | 5.19                         | 0.820         | 0.748         | 0.701         | 0.791         | 4  | 0.824  | 591                                        | 20.0                              | 10.6     | 0.739        | 0.681        | 16    | 707 | 0.867      |
| 22       | 5.26                         | 0.717         | 0.605         | 0.659         | 0.617         | 5  | 0.712  | 657                                        | 17.2                              | 9.27     | 0.608        | 0.613        | 13    | 626 | 0.744      |
| 12       | 6.09                         | 0.926         | 0.905         | 0.893         | 0.885         | 4  | 0.931  | 547                                        | 20.0                              | 10.6     | 0.924        | 0.821        | 16    | 707 | 0.924      |
| 21       | 6.53                         | 0.942         | 0.919         | 0.950         | 0.864         | 5  | 0.899  | 680                                        | 18.4                              | 9.66     | 0.938        | 0.848        | 13    | 650 | 0.909      |
| 17       | 7.65                         | 0.955         | 0.935         | 0.962         | 0.881         | 4  | 0.919  | 586                                        | 17.5                              | 9.03     | 0.949        | 0.864        | 12    | 624 | 0.935      |
| 27       | 8.07                         | 0.850         | 0.866         | 0.926         | 0.835         | 4  | 0.846  | 544                                        | 16.9                              | 8.79     | 0.873        | 0.708        | 12    | 611 | 0.844      |
| 25       | 15.9                         | 0.889         | 0.898         | 0.923         | 0.861         | 5  | 0.839  | 513                                        | 16.9                              | 8.79     | 0.900        | 0.826        | 12    | 611 | 0.862      |
| 24       | 16.3                         | 0.861         | 0.847         | 0.874         | 0.824         | 5  | 0.837  | 522                                        | 17.2                              | 9.12     | 0.859        | 0.694        | 13    | 639 | 0.849      |
| 32       | 35.9                         | 0.863         | 0.675         | 0.651         | 0.613         | 4  | 0.750  | 540                                        | 17.2                              | 9.12     | 0.762        | 0.751        | 13    | 639 | 0.789      |
| 31       | 40.4                         | 0.947         | 0.831         | 0.864         | 0.837         | 4  | 0.800  | 529                                        | 17.2                              | 9.12     | 0.845        | 0.618        | 13    | 639 | 0.894      |

<sup>a</sup> Entries for structural descriptors are the overlap coefficients of the conjugate with respect to **15**.

**Table S5.** Results from multivariable regression analysis and modified Akaike Information Criterion ( $AIC_c$ ) for the best CSP-SAR model for aniliny conjugates **1-33** of glu-CDCA.<sup>a</sup>

| CSP-SAR Model                                  | $r^2$ | $Q^2$ | $F$  | $W_i$ | $K$ ( $\mu\text{M}$ ) | $A$ ( $\mu\text{M}/\text{kcal/mol}$ ) | $B$ ( $\mu\text{M}/\text{\AA}^2$ ) | $C$ ( $\mu\text{M}$ ) | $D$ ( $\mu\text{M}$ ) | Standardized $A$ ( $\mu\text{M}$ ) | Standardized $B$ ( $\mu\text{M}/\text{\AA}^2$ ) | Standardized $C$ ( $\mu\text{M}$ ) | Standardized $D$ ( $\mu\text{M}$ ) |
|------------------------------------------------|-------|-------|------|-------|-----------------------|---------------------------------------|------------------------------------|-----------------------|-----------------------|------------------------------------|-------------------------------------------------|------------------------------------|------------------------------------|
| $\Delta G_w$ , O7-AA-C20, C18-GS-O7, GS-O3-C19 | 0.837 | 0.347 | 34.6 | 0.207 | -93.0 $\pm$ 18        | -0.765 $\pm$ 0.068                    | 95.7 $\pm$ 29                      | 51.5 $\pm$ 16         | -106 $\pm$ 32         | -1.092                             | 0.441                                           | 0.461                              | -0.611                             |

<sup>a</sup>  $A$  and  $B$  represent the coefficient of the independent variables (molecular descriptors);  $K$  represents the coefficient of the intercept.

**Table S6.** Results from single variable regression of molecular descriptors used for multivariable analysis.<sup>a</sup>

| <b>Molecular Descriptor</b>            | <b>Linear <math>r^2</math></b> | <b>Coeff. independent variable<sup>b</sup></b> | <b>SEM of coeff. of independent variable<sup>b</sup></b> | <b>Coeff. of intercept (<math>\mu\text{M}</math>)</b> | <b>SEM of coeff. of intercept (<math>\mu\text{M}</math>)</b> |
|----------------------------------------|--------------------------------|------------------------------------------------|----------------------------------------------------------|-------------------------------------------------------|--------------------------------------------------------------|
| $\Delta G_w$ (kcal/mol)                | 0.868                          | -0.358                                         | 0.026                                                    | -23.4                                                 | 2.3                                                          |
| $\log P_c$                             | 0.862                          | -4.30                                          | 0.32                                                     | 10.5                                                  | 0.69                                                         |
| C18-GS-O7                              | 0.259                          | -33.3                                          | 10                                                       | 32.1                                                  | 8.1                                                          |
| C19-GS-O3                              | 0.253                          | -32.8                                          | 10                                                       | 32.4                                                  | 8.4                                                          |
| O7-C18-GS                              | 0.238                          | -32.2                                          | 11                                                       | 32.5                                                  | 8.8                                                          |
| O7-AA                                  | 0.225                          | -49.5                                          | 17                                                       | 49.0                                                  | 15                                                           |
| O7-AA-C20                              | 0.202                          | -45.9                                          | 17                                                       | 46.1                                                  | 15                                                           |
| O7-AA-GS                               | 0.189                          | -29.3                                          | 11                                                       | 28.2                                                  | 8.5                                                          |
| HA                                     | 0.186                          | 4.69                                           | 1.8                                                      | -25.2                                                 | 12                                                           |
| O3-C18-GS                              | 0.172                          | -27.6                                          | 11                                                       | 28.9                                                  | 9.2                                                          |
| O7-C19-GS                              | 0.162                          | -30.7                                          | 13                                                       | 30.9                                                  | 10                                                           |
| O7-GS <sub>min</sub>                   | 0.158                          | -25.7                                          | 11                                                       | 25.0                                                  | 8.0                                                          |
| PSA <sub>side</sub> ( $\text{\AA}^2$ ) | 0.156                          | 0.130                                          | 0.056                                                    | -18.7                                                 | 11                                                           |
| O7-GS                                  | 0.152                          | -25.9                                          | 11                                                       | 24.8                                                  | 8.1                                                          |
| O3-AA-GS                               | 0.150                          | -26.5                                          | 12                                                       | 26.2                                                  | 8.8                                                          |
| C18-GS-O3                              | 0.149                          | -23.2                                          | 10                                                       | 24.8                                                  | 8.3                                                          |
| O3-GS <sub>min</sub>                   | 0.133                          | -23.3                                          | 11                                                       | 23.4                                                  | 8.1                                                          |
| BC-GS <sub>min</sub>                   | 0.132                          | -22.8                                          | 11                                                       | 22.8                                                  | 7.9                                                          |
| AA-GS-O3                               | 0.129                          | -24.5                                          | 12                                                       | 24.7                                                  | 8.9                                                          |
| O3-GS                                  | 0.126                          | -24.0                                          | 12                                                       | 23.5                                                  | 8.4                                                          |
| GS-O7-C18                              | 0.125                          | -27.0                                          | 13                                                       | 28.2                                                  | 11                                                           |
| O3-GS <sub>max</sub>                   | 0.123                          | -25.0                                          | 12                                                       | 23.0                                                  | 8.3                                                          |
| C19-GS <sub>min</sub>                  | 0.121                          | -24.5                                          | 12                                                       | 23.9                                                  | 8.8                                                          |
| C18-GS <sub>min</sub>                  | 0.121                          | -24.5                                          | 12                                                       | 24.1                                                  | 8.9                                                          |
| O7-GS <sub>max</sub>                   | 0.119                          | -22.5                                          | 11                                                       | 21.5                                                  | 7.7                                                          |
| O3-AA-C20                              | 0.114                          | -29.2                                          | 15                                                       | 31.9                                                  | 13                                                           |
| BC-GS                                  | 0.110                          | -22.0                                          | 12                                                       | 21.7                                                  | 8.1                                                          |
| AA-GS-O7                               | 0.109                          | -21.2                                          | 11                                                       | 21.8                                                  | 8.2                                                          |
| O7-AA-BC                               | 0.108                          | -29.8                                          | 16                                                       | 32.4                                                  | 14                                                           |
| BC-GS <sub>max</sub>                   | 0.101                          | -21.6                                          | 12                                                       | 20.6                                                  | 8.0                                                          |
| PSA ( $\text{\AA}^2$ )                 | 0.0997                         | 0.105                                          | 0.058                                                    | -21.6                                                 | 16                                                           |
| C19-GS                                 | 0.0991                         | -23.5                                          | 13                                                       | 22.9                                                  | 9.3                                                          |
| O7-AA-C18                              | 0.0973                         | -27.6                                          | 16                                                       | 29.6                                                  | 13                                                           |
| GS-O3-C18                              | 0.0902                         | -26.1                                          | 15                                                       | 28.1                                                  | 13                                                           |
| O3-C19-GS                              | 0.0840                         | -24.6                                          | 15                                                       | 26.6                                                  | 12                                                           |
| C18-GS                                 | 0.0824                         | -19.6                                          | 12                                                       | 20.0                                                  | 8.5                                                          |
| C19-GS <sub>max</sub>                  | 0.0753                         | -20.7                                          | 14                                                       | 20.1                                                  | 8.9                                                          |
| SASA ( $\text{\AA}^2$ )                | 0.0702                         | -0.0436                                        | 0.029                                                    | 49.3                                                  | 29                                                           |
| O3-AA                                  | 0.0690                         | -25.3                                          | 17                                                       | 28.3                                                  | 15                                                           |
| BC-AA                                  | 0.0653                         | -24.0                                          | 17                                                       | 26.9                                                  | 14                                                           |
| C18-GS <sub>max</sub>                  | 0.0584                         | -15.9                                          | 12                                                       | 16.5                                                  | 7.6                                                          |
| GS-O7-C19                              | 0.0468                         | -23.5                                          | 20                                                       | 25.1                                                  | 16                                                           |

|                                        |          |          |       |       |    |
|----------------------------------------|----------|----------|-------|-------|----|
| C19-GS-O7                              | 0.0348   | -15.3    | 15    | 18.1  | 11 |
| GS-O7-AA                               | 0.0272   | -17.1    | 19    | 19.3  | 14 |
| O7-AA-C19                              | 0.0219   | 13.4     | 17    | -4.9  | 14 |
| O3-AA-C18                              | 0.0203   | -13.5    | 17    | 17.8  | 15 |
| O3-AA-C19                              | 0.0197   | -12.9    | 17    | 17.6  | 14 |
| GS-O3-C19                              | 0.0186   | -14.8    | 20    | 18.5  | 16 |
| HD                                     | 0.0177   | 3.27     | 4.5   | -7.03 | 19 |
| C19-AA                                 | 0.0172   | -12.1    | 17    | 16.7  | 14 |
| SASA <sub>side</sub> (Å <sup>2</sup> ) | 0.00957  | -0.0174  | 0.033 | 16.2  | 18 |
| MR (m <sup>3</sup> /mol)               | 0.00742  | -0.798   | 1.7   | 20.6  | 30 |
| KierFlex                               | 0.00628  | -1.24    | 2.9   | 18.2  | 27 |
| O3-AA-BC                               | 0.00438  | -6.29    | 18    | 11.9  | 15 |
| GS-O3-AA                               | 8.59E-04 | -2.58    | 16    | 8.46  | 12 |
| brotN                                  | 2.41E-04 | -0.110   | 1.3   | 8.01  | 17 |
| MW                                     | 1.78E-04 | -0.00384 | 0.053 | 9.04  | 34 |
| C18-AA                                 | 1.35E-05 | -0.384   | 19    | 6.91  | 17 |

<sup>a</sup> Regression analysis of structural descriptors (e.g. C18-GS-O7) employed the overlap coefficients with respect to **15**.

<sup>b</sup> Coefficient of independent variable has units of μM divided by units of the molecular descriptor (e.g. μM/Å<sup>2</sup> for SASA).

**Table S7.** Results from multivariable regression analysis and modified Akaike Information Criterion (AIC<sub>C</sub>) for the two best CSP-SAR models for anilinyI conjugates of glu-CDCA using  $pK_i$  (i.e.  $-\log K_i$ ) as biological activity.<sup>a</sup>

| CSP-SAR Model                                        | $r^2$ | $Q^2$ | $F$  | $W_i$   | $K$ ( $\mu\text{M}$ ) | $A$                                               | $B$ ( $\mu\text{M}$ ) | $C$ ( $\mu\text{M}$ ) | $D$ ( $\mu\text{M}$ ) | Standardized $A$                        | Standardized $B$ ( $\mu\text{M}/\text{\AA}^2$ ) | Standardized $C$ ( $\mu\text{M}$ ) | Standardized $D$ ( $\mu\text{M}$ ) |
|------------------------------------------------------|-------|-------|------|---------|-----------------------|---------------------------------------------------|-----------------------|-----------------------|-----------------------|-----------------------------------------|-------------------------------------------------|------------------------------------|------------------------------------|
| 1) logP, O7-AA-BC, C18-GS <sub>max</sub> , O7-AA-C19 | 0.683 | 0.532 | 14.0 | 0.992   | -1.02 ± 0.43          | 0.237 ± 0.034 ( $\mu\text{M}$ )                   | -1.89 ± 0.80          | -0.961 ± 0.44         | 2.84 ± 0.91           | 1.14 ( $\mu\text{M}$ )                  | -0.463                                          | -0.325                             | 0.690                              |
| 2) $\Delta G_w$ , HD                                 | 0.567 | 0.495 | 18.4 | 0.00785 | 2.08 ± 0.62           | 0.0120 ± 0.0022 ( $\mu\text{M}/\text{kcal/mol}$ ) | - 0.401 ± 0.14        | N/A                   | N/A                   | 0.692 ( $\mu\text{M}/\text{kcal/mol}$ ) | - 0.362                                         | N/A                                | N/A                                |

<sup>a</sup>  $A$  and  $B$  represent the coefficient of the independent variables (molecular descriptors);  $K$  represents the coefficient of the intercept.

**Table S8.**  $^{13}\text{C}$  and  $^1\text{H}$  chemical shifts of **32** in  $\text{D}_2\text{O}$ -phosphate (pH 7.4).

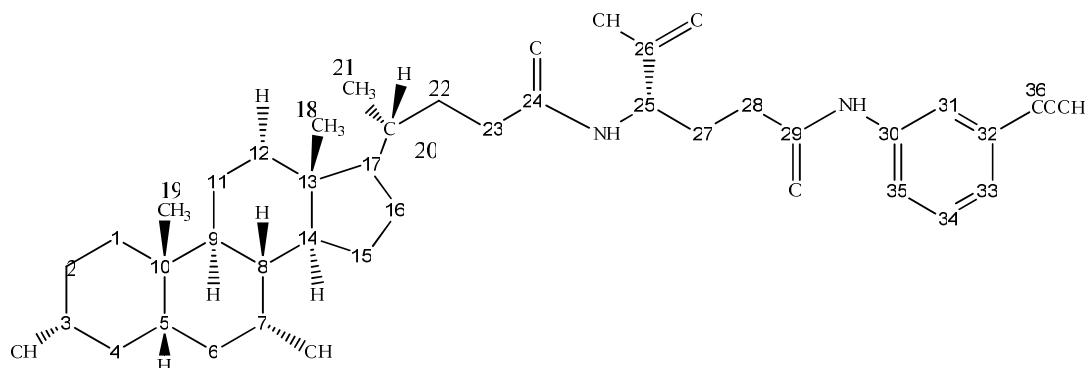

| Carbon No. | Type            | $^{13}\text{C}$ | $^1\text{H}$ |                   |                  |
|------------|-----------------|-----------------|--------------|-------------------|------------------|
|            |                 |                 | H            | $\text{H}_\alpha$ | $\text{H}_\beta$ |
| C1         | CH <sub>2</sub> | 35.30           | -            | 1.79              | 0.93             |
| C2         | CH <sub>2</sub> | 29.95           | -            | 1.58              | 1.27             |
| C3         | CH              | 72.36           | 3.45         | -                 | -                |
| C4         | CH <sub>2</sub> | 38.96           | -            | 1.97              | 1.63             |
| C5         | CH              | 41.43           | 1.34         | -                 | -                |
| C6         | CH <sub>2</sub> | 34.37           | -            | 1.87              | 1.43             |
| C7         | CH              | 69.07           | 3.65         | -                 | -                |
| C8         | CH              | 39.38           | 1.28         | -                 | -                |
| C9         | CH              | 32.82           | 1.66         | -                 | -                |
| C10        | C               | 39.28           | -            | -                 | -                |
| C11        | CH <sub>2</sub> | 20.78           | -            | 1.39              | 1.16             |
| C12        | CH <sub>2</sub> | 39.66           | -            | 1.86              | 1.07             |
| C13        | C               | 42.72           | -            | -                 | -                |
| C14        | CH              | 50.36           | 1.20         | -                 | -                |
| C15        | CH <sub>2</sub> | 23.75           | -            | 1.49              | 0.88             |
| C16        | CH <sub>2</sub> | 28.37           | -            | 1.74              | 1.08             |
| C17        | CH              | 55.71           | 0.97         | -                 | -                |
| C18        | CH <sub>3</sub> | 11.64           | 0.50         | -                 | -                |
| C19        | CH <sub>3</sub> | 22.71           | 0.80         | -                 | -                |
| C20        | CH              | 35.30           | 1.28         | -                 | -                |
| C21        | CH <sub>3</sub> | 18.19           | 0.84         | -                 | -                |
| C22        | CH <sub>2</sub> | 32.41           | -            | 1.67              | 1.20             |
| C23        | CH <sub>2</sub> | 33.82           | -            | 2.33              | 2.13             |
| C24        | C               | 177.7           | -            | -                 | -                |
| C25        | CH              | 55              | 4.29         | -                 | -                |
| C26        | C               | 178.9           | -            | -                 | -                |
| C27        | CH <sub>2</sub> | 27.87           | -            | 2.19              | 2.07             |
| C28        | CH <sub>2</sub> | 33.65           | -            | 2.54              | 2.48             |
| C29        | C               | 174.4           | -            | -                 | -                |
| C30        | C               | 137.8           | -            | -                 | -                |
| C31        | CH              | 121.7           | 7.84         | -                 | -                |
| C32        | C               | 126.33          | -            | -                 | -                |
| C33        | CH              | 126.1           | 7.66         | -                 | -                |
| C34        | CH              | 129.5           | 7.73         | -                 | -                |
| C35        | CH              | 123.8           | 7.72         | -                 | -                |
| C36        | C               | 175             | -            | -                 | -                |

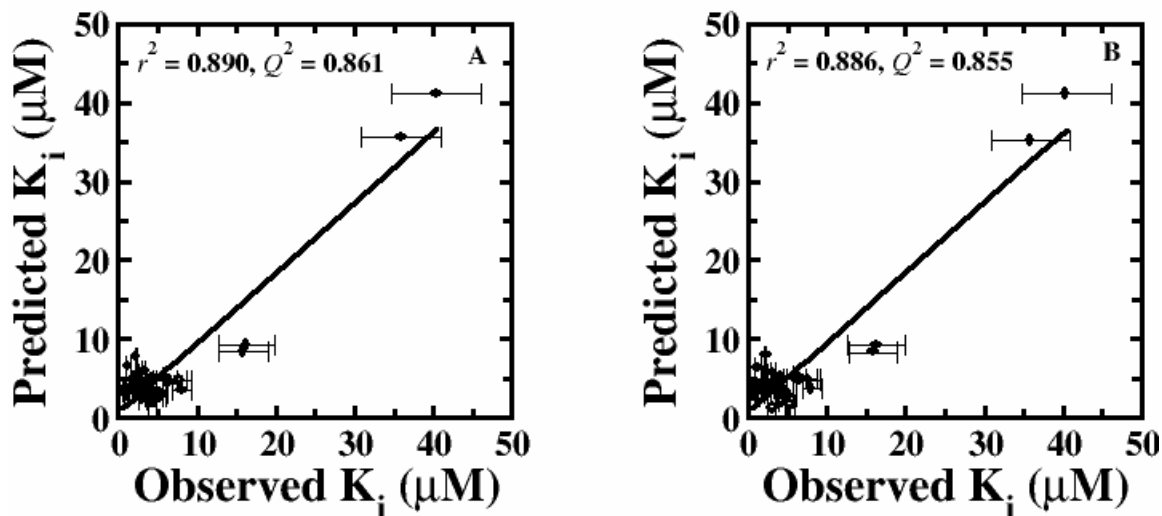

**Figure S1.** Regression plot for predicted vs. observed  $K_i$  values for anilinyI conjugates of glu-CDCA using CSP-SAR (A) Model 2 and (B) Model 3, which are the models in Table 2.

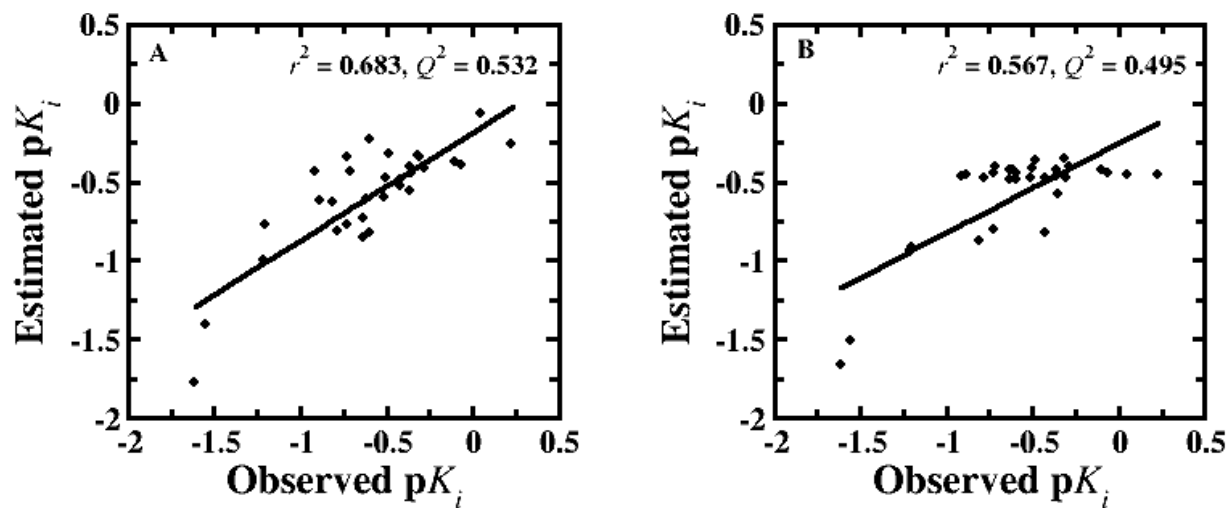

**Figure S2.** Regression plot for predicted vs. observed  $pK_i$  values for anilinyI conjugates of glu-CDCA using CSP-SAR (A) Model 1 and (B) Model 2, which are the models in Table S7.
